# Supplementary material for: DNA methylation–based immune response signature improves patient diagnosis in multiple cancers
Source: JCI journal article supplement (doi:10.1172/jci91095), 2017-07-16

# DNA methylation-based immune response signature improves patient diagnosis in multiple cancers

Jana Jeschke et al.

---

## SUPPLEMENTAL MATERIAL

### 1. Supplemental Methods

### 2. Supplemental Methods References

### 3. Supplemental Figures

eFigure 1. Development of the MeTIL signature.

eFigure 2. Machine learning approach.

eFigure 3. MeTIL score correlates with IHC-based TIL counts.

eFigure 4. MeTIL score values in T-cell subsets.

eFigure 5. MeTIL score reflects functionality of CTLs.

eFigure 6. MeTIL score values differ between cell types of the tumor microenvironment.

eFigure 7. Predictive values of the MeTIL score or gene expression-based immune markers for response to preoperative anthracycline treatment.

eFigure 8. Balanced-Error Rate.

### 4. Supplemental Tables

eTable 1. Probe information for T-cell-associated markers.

eTable 2. Clinical data for cohort 1.

eTable 3. Histopathologic TIL evaluation methods.

eTable 4. Probe information for MeTIL signature markers.

eTable 5. Clinical data for cohort 2.

eTable 6. Clinical data for TOP trial.

eTable 7. Baseline characteristics of breast cancer patient cohorts.

eTable 8. Correlation between the MeTIL score or PaTIL and median survival of breast cancer patients by breast cancer subtype in various cohorts (univariate COX proportional hazards regression).

eTable 9. Correlation between the MeTIL score and other clinical and pathological variables and response to neoadjuvant anthracycline therapy in TOP cohort (logit regression).

eTable 10. Correlation between the MeTIL score or gene expression-based immune markers and response to neoadjuvant anthracycline therapy in TOP cohort (logit regression).

eTable 11. Baseline characteristics of patients in different cancer cohorts from TCGA.

eTable 12. Correlation between MeTIL score or PaTIL and median survival of patients in various cancer cohorts (univariate COX proportional hazards regression).

eTable 13. Correlation between the MeTIL score or PaTIL and median survival of cancer patients in context of other prognostic clinical and pathological variables in various cancer cohorts (multivariate COX proportional hazards regression).

eTable 14. Primer information for bisulfite pyrosequencing.

eTable 15. PCA parameters.

## 1. SUPPLEMENTAL METHODS

### Patient cohorts

Three BC patient cohorts were used in this study. **Cohort 1** and **cohort 2** consist of 118 and 119 retrospectively selected fresh frozen tumor samples from patients treated with adjuvant therapies, as per institutional recommendations, and diagnosed at the Jules Bordet Institute from 1995 to 2003 and 2004 to 2009, respectively. Both studies received approval by local ethics committees (Institute Jules Bordet, nr 1918). Samples for both cohorts were selected according to the following criteria: (i) sufficient presence of invasive cells as defined by a pathologist (> 90% of tumor area); (ii) > 2µg yield of DNA available; (iii) balanced distribution of the four main “BC expression subtypes” determined by IHC; and (iv) balanced distribution of patients with and without relapses within each subtype. Of note, cohort 2 was slightly enriched in basal-like tumors as compared to cohort 1. For survival analyses, we considered only samples for which the lymphocyte infiltration assessed by pathology (PaTIL) and BC subtypes defined based on IHC results of the hormone receptor (ER and/or PR) and HER2 were available resulting in cohort sizes of 105 and 100 for cohort 1 and cohort 2, respectively. ‘The preoperative Trial of Principle’ (**TOP**) cohort consists of 149 patients with estrogen receptor (ER) negative disease that were treated at the Jules Bordet Institute from 2003 to 2008 with neoadjuvant epirubicin monotherapy (100 mg/m<sup>2</sup>). Patients with operable BC were treated every 3 weeks for four cycles and patients with inflammatory or locally advanced BC every 2 weeks for six cycles. Pretreatment biopsies were obtained from the primary lesion. Pathologic complete response (pCR) was the primary endpoint of this trial. pCR was defined as the absence of residual invasive breast carcinoma in the breast and in the axillary nodes after completion of chemotherapy. Persistence of in situ carcinoma without an invasive component was also considered pCR. Fifty-eight fresh frozen samples with sufficient amount of tumor cells and high DNA yield were selected for Infinium methylation analyses. Patients provided written informed consent prior to study entry. The study received approval by local ethics committees. The trial, including methodology, baseline patient characteristics and results, has been extensively reported by Desmedt et al. (1). The clinical and pathological characteristics for the three patient cohorts are summarized in eTable 7. The primary outcome was overall survival, calculated from the date of surgery to the date of death or date of last follow-up. Disease-free survival was calculated as the time from the date of surgery to the time of recurrence or date of last follow-up. Median follow-up times for overall or disease-free survival were 89, 55 and 37 months for PNC1, PNC2 and TOP, respectively.

### TCGA cancer data

DNA methylation data and PaTIL for twenty cancer types were downloaded from the TCGA data repository ([March 2015](#)) and clinical data and survival information from the ‘firehose’ website ([‘Clinical Pick Tier1’](#) files January 2017). The clinical and pathological characteristics for the TCGA cohorts are summarized in eTable 11. Histopathological measurements of TILs for TCGA tumors were performed as summarized in eTable 3. Melanoma subtype information were obtained from a recent study by the Cancer Genome Atlas Network (2).

### ENCODE and other public data

ENCODE data for different cell types typically found in a breast tumor biopsy (breast epithelial cells, lymphocytes, fibroblasts, muscle cells, endothelial cells, and adipocytes) were retrieved from GEO

(GSE40699 and GSE40700) and different types of sorted blood cells were also obtained from GEO (GSE35069, GSE39981, GSE49667 and GSE59796). The GSE40699, GSE35069, GSE49667 and GSE59796 series contains Infinium HumanMethylation450K raw data (.idat or raw intensities) that were quality checked and preprocessed similarly our in-house array data (see *Infinium HumanMethylation450K pre-processing*). The GSE40700 and GSE39981 series contains Infinium HumanMethylation27K data expressed as methylation scores ranging from 0 to 100 or 1000 (GSE40700) or raw intensities (GSE39981). These data were converted as Beta-values (0 to 1 range) and used as such. Beta-values of the five cytosines from the MeTIL signature were used to compute the MeTIL score using the formula described in *Establishment of the MeTIL score*.

### **Tumor preparation and flow cell sorting**

Fresh breast tumor tissues were collected immediately following surgery and dissociated (without enzymatic digestion) using the GentleMacs Dissociator (Miltenyi Biotec, Begisch Gladbach, Germany) prior to Ab labeling, as previously described (3). Fluorescent-conjugated antibodies against CD45 (BD Biosciences, San Jose, CA, USA) and Epcam (Miltenyi Biotec, Netherlands) were used for surface staining of cells, according to manufacturer's protocol. Fluorescently labeled lymphocytes (CD45+Epcam-) and tumor cells (CD45-Epcam+) were sorted on a Moflo ASTRIOS EQ 12/4 sorter. The cell purity were controlled on a GALLIOS 10/3 cytometer and analyzed using Kaluza® 1.3 Flow Analysis Software (Beckman Coulter, Brea, CA, USA).

### **DNA methylation profiling**

#### *Infinium HumanMethylation450K*

Genomic DNA was extracted with the Qiagen-DNeasy Blood & Tissue Kit (Qiagen, Hilden, Germany) or the QIAamp DNA Mini Kit (Qiagen, Hilden, Germany) as previously described (4). DNA methylation was analyzed on Infinium HumanMethylation450K bead-arrays. Genomic DNA (300 to 800 ng) was converted with sodium bisulfite using the Zymo EZ DNA Methylation Kit (Zymo Research, Orange, USA) following the alternative incubation conditions of the manufacturer recommended for Illumina Infinium HumanMethylation assays. Methylation assays were performed with 4 ml converted DNA at 50 ng/ml according to the manufacturer's protocol. GenomeStudio™ Methylation Module software (TOP cohort) or methylumi R package (other cohorts) were used to extract raw probe intensity values. The quality of array data was evaluated using the visualization tool from GenomeStudio™ (or in-house R reimplementation of this tool) by assessing the intensity level of the control probes. All samples that showed the expected profiles for the different control probes were utilized for further analyses. Infinium HumanMethylation 450K raw data were submitted to Gene Expression Omnibus database (<http://www.ncbi.nlm.nih.gov/geo/query/acc.cgi?GSE72308>). Breast epithelial cell and lymphocyte methylation and gene expression profiles were assessed using HumanMethylation27K and Affymetrix HG133 Plus 2.0 expression arrays in a previous study (<http://www.ncbi.nlm.nih.gov/geo/query/acc.cgi?acc=GSE20713>).

#### *Bisulfite pyrosequencing*

PyroMark Assay Design 2.0 and PyroMark Q24 software (Qiagen) were used for the design of PCR and sequencing primers and for analysis and visualization of pyrosequencing results, respectively. PCR primers

for each marker of the MeTIL signature were designed around the target cytosine from the Infinium probe. Thereby, the product size was kept as minimal as possible to anticipate amplification difficulties of fragmented bisulfite-treated FFPE DNA. Genomic DNA (275 ng) was bisulfite-converted with the EZ DNA Methylation<sup>TM</sup> kit (Zymo Research) and 3 to 6 µl of converted DNA (corresponding to approximately 45 - 95 ng DNA) served as input for PCR. PCR assays were performed with HotStarTaq DNA polymerase (Qiagen) under the following cycle conditions: 95°C 15 min; 50 to 60 cycles of 95°C 1 min; 50 - 53°C 1 min; 72°C 1 min; 72°C 10 min. Amplification was confirmed on an agarose gel and pyrosequencing of successfully amplified PCR products was performed with the PyroMark<sup>TM</sup> Q24 system (Qiagen). Primer sequences are provided in eTable 14.

## Bioinformatics

*Infinium HumanMethylation450K pre-processing:* Raw data (uncorrected probe intensity values) from the Infinium Methylation arrays were processed with the following steps: Probes of low quality (detection p-value threshold of 0.05), cross-reactive probes (i.e. targeting several genomic locations) as well as probes containing SNPs based on the extended annotation of Price et al. (5, 6) were removed. Additionally, probes targeting X and Y-chromosomes were removed from the analysis. Beta-values were computed using the following formula: Beta-value =  $M/[U+M]$  where M and U are the raw “methylated” and “unmethylated” signals, respectively. Beta-values were corrected for type I and type II bias using the peak-based correction (6, 7).

*Selection of markers for MeTIL signature:* Given that among TILs, T-cell subsets are most abundant (8) and associated with clinical outcomes (9-12), we identified in a first step T-lymphocyte-associated cytosines by utilizing previously published genome-wide DNA methylation profiles (Infinium HumanMethylation) from eight normal or cancerous breast epithelial cell lines (MCF10A, MCF-7, T47D, SKBR3, BT20, MDA-MB-231, MDA-MB-361, ZR-75-1) and three T-lymphocyte samples (WEIS3E5, R12C9 and ex-vivo T-cells) (4). We computed the median Beta-value for each probe in the group of T-lymphocytes and in the group of breast epithelial cells (eFigure 1) and calculated the delta Beta-value for each probe between the median Beta-values of the two groups (Median<sub>T-lymphocytes</sub> – Median<sub>Breast epithelial cells</sub>). Since our previous work in BC revealed that TILs are reflected primarily through hypomethylation of immune-related genes (4), we selected probes that were hypomethylated in T-lymphocytes versus breast epithelial cells with a minimum difference in delta Beta of 0.8 (Delta Beta < -0.8). To identify the most discriminative probes, we further selected for probes that showed a low variability within both groups ( $SD_{T-lymphocytes} \leq 0.1$  &  $SD_{Breast epithelial cells} \leq 0.1$ ). This selection approach yielded 29 T-lymphocyte-associated markers (eTable 1).

*MeTIL signature optimization (machine learning):* We applied a machine learning approach to select for probes from the list of T-lymphocyte-associated cytosines (eTable 1) that reflect most accurately the quantity of PaTIL in patient samples (eFigure 2). We utilized Infinium HumanMethylation profiles of 105 breast primary tumors (cohort 1) for which H&E staining-based PaTIL (in %) were available. We defined three PaTIL categories based on the pathological intra-tumoral (iTU-Ly) PaTIL readings: ‘PaTIL-Absent’ (PaTIL < 1%), ‘PaTIL-Low’ (PaTIL ≥ 1% & PaTIL ≤ 20%) and ‘PaTIL-High’ (PaTIL > 20% & PaTIL ≤ 100%). The BC cohort was divided into three parts (two ‘training’ sets and one ‘test’ set) in order to apply a three-fold cross validation. To establish a small signature with minimal redundancy between probes we applied the mRMR feature selection method to the training set (13). To account for the unequal size

between the three TIL categories (PaTIL-High is smaller than PaTIL-Low or PaTIL-Absent), we integrated the ‘EasyEnsemble’ approach (14) into the model. This approach trained 20 different Random Forest models, each model on a different data set obtained through the inclusion of all samples from the PaTIL-High category while randomly selecting the same number of samples from the PaTIL-Low and the PaTIL-Absent category. The performance of the developed ‘EasyEnsemble’ models was assessed through prediction making in the test set and the computation of the ‘Balanced-Error Rate’ (BER). For a more robust estimation of the BER, a three-fold cross validation was applied 200 times and for each run randomized data were used as negative control. This entire process was repeated for a signature size ranging from a single cytosine to the entire set of T-lymphocyte-associated cytosines. The signature size, for which no more improvement of the BER was observed (five features signature size), was selected as the final size (eFigure 8). This process generated 3x200 output signatures. The distance between the signatures

$$1 - \left( \sum_{i=1}^k cor_{spear}(F1_i, F2_i) \right) / k$$

was defined as  $(cor_{spear} \text{ refers to the spearman correlation, } F1_i \text{ to the } i^{th} \text{ feature from signature 1 and } F2_i \text{ to the } i^{th} \text{ feature from signature 2 after sorting the features in order to maximize the sum of the spearman correlation})$ . For each signature, the sum of its pairwise distance to all other output signatures was computed, and the signature with the smallest sum was assumed to be the most representative and chosen as final signature (named MeTIL signature) (eTable 4).

*Establishment of the MeTIL score:* We applied a “normalized PCA” (NPCA) approach to transform the individual methylation values of the probes of the machine learning-derived MeTIL signature into a score (MeTIL score), which reflects TIL percentage in a way that does not require complex algorithm and can easily be applied by any lab on any methylation dataset. Therefore, we first standardized ( $\mu=0$ ,  $\sigma=1$ ) the Beta-values of each CpG from the signature on the discovery dataset (cohort 1). We then applied a principal component analysis (PCA) and used the first component as final MeTIL score for the samples of the discovery set. The MeTIL score on any other datasets was obtained using the NPCA parameters derived from the discovery set with the following formula:  $Sc(\mathbf{beta}|\vec{s}, \vec{c})\vec{v}$  ( $\mathbf{beta}$  is the matrix of Beta-values for the MeTIL signature on the new dataset,  $Sc(\mathbf{beta}|\vec{s}, \vec{c})$  are the data transformed using the scale  $s$  and the center  $c$  from the discovery cohort and  $\vec{v}$  is the eigenvector from the discovery cohort. Note that this formula also allows any reader to generate the MeTIL score from its own methylation data, for example using the following command in R language: `(scale(beta, center=c1, scale=s1)%*%v1)[,1]` ( $\mathbf{beta}$  is the matrix of Beta-values for the probes from the signature (with samples in rows and probes in column) and  $c1$ ,  $s1$  and  $v1$  are parameters from our discovery cohort that can be found in eTable 15).

*Simulations:* Whole tumor samples were simulated using Infinium methylation profiles from cell lines. Breast epithelial cell line profiles were used to mimic tumor cells while T-lymphocyte profiles represented TILs. A random selection of methylation probes across all cell lines was used to simulate the presence of additional cells types typically represented in a tumor (fibroblasts, endothelial cells, macrophages etc.). These three components and additional noise were combined using the following formula:  $M_c = f_1M_1 + f_2M_2 + f_3M_3 + e$  where  $M_c$  is the combined M-value,  $f_1$ ,  $f_2$  and  $f_3$  are the fractions of TILs, tumor cells and other cell-type(s) in the simulated tissue, respectively, and  $M_1$ ,  $M_2$  and  $M_3$  are their respective M-values and  $e$  a Gaussian noise of mean equal to 0 and standard deviation of  $ws$  ( $s$  is computed as the standard deviation of the delta between M-values of each possible pair of cell lines from the same type across all Infinium probes and  $w$  is a weight used to increase/decrease the noise level). M-values were used in this analysis since the heteroscedasticity and the bounded nature of Beta-values are incompatible

with a Gaussian noise while M-value are homoscedastic and unbounded (15). The conversion from Beta-values to M-values was achieved using a previously described formula (6). The combined M-value  $M_c$  was converted back into a Beta-value using the appropriate formula (6) and the MeTIL score was computed using the formula described in “Establishment of the MeTIL score”. To verify the correlation between the MeTIL score and TILs, simulations were performed for increasing values of  $f1$  with fixed value of  $e$  and  $f3$ , and  $f2$  defined as  $1-(f1+f3)$ . 50 steps of  $f1$  were assessed (*i.e.* each step corresponding to a 2% increase in TILs if  $f3=0$ ) and 200 simulations were calculated at each step allowing the spearman correlation to be computed from 10 000 dots. Figure 1G was obtained by performing this process with different values of  $f3$  (1% increased at each step) and  $w$  (0.05 increase by step).

## Statistics

Statistical analyses were conducted with RStudio Version 0.94.110. Hierarchical clustering was applied using the Euclidian distance and complete linkage. Correlations were computed using the Spearman method and their significance were assessed using a correlation test. Differences between more than two groups were assessed with a one-way ANOVA (for continuous variable) or Chi<sup>2</sup> test (for discrete ones). Survival analyses were conducted with the 'survival' package. Cox proportional hazard regression analyses and Kaplan-Meier survival curves with log-rank tests, recording patients at the time of death or recurrence or last follow-up visit, were used to compare overall survival or disease free survival rates. Multivariate Cox regression models were established using a forward and backward variable selection based on the Akaike's information criterion (AIC) from the 'MASS' package. The model with the lowest AIC, including the variable of interest (MeTIL score or PaTIL), was chosen as the final multivariate model. Co-variables for multivariate Cox models in breast and other cancers were binarized as displayed in eTable 7 and 11. Missing data points for co-variables (if missed in < 10% of samples) were imputed by the simple mean matching method (16, 17). Odds ratios (ORs) were used to compare pCR rates. The area under the curve (AUC) was used to assess prediction performance. ROC and AUC were computed using the 'pROC' package. Generalized linear models (glm) and ORs were computed with the 'aod' package. All  $P$  values were two sided and  $P$  values < 0.05 were considered to be statistically significant.

## 2. SUPPLEMENTAL REFERENCES

1. Desmedt, C., Di Leo, A., de Azambuja, E., Larsimont, D., Haibe-Kains, B., Selleslags, J., Delaloge, S., Duhem, C., Kains, J.P., Carly, B., et al. 2011. Multifactorial approach to predicting resistance to anthracyclines. *J Clin Oncol* 29:1578-1586.
2. Cancer Genome Atlas Network. Electronic address, i.m.o., and Cancer Genome Atlas, N. 2015. Genomic Classification of Cutaneous Melanoma. *Cell* 161:1681-1696.
3. Garaud, S., Gu-Trantien, C., Lodewyckx, J.N., Boisson, A., De Silva, P., Buisseret, L., Migliori, E., Libin, M., Naveaux, C., Duvillier, H., et al. 2014. A simple and rapid protocol to non-enzymatically dissociate fresh human tissues for the analysis of infiltrating lymphocytes. *J Vis Exp*.
4. Dedeurwaerder, S., Desmedt, C., Calonne, E., Singhal, S.K., Haibe-Kains, B., Defrance, M., Michiels, S., Volkmar, M., Deplus, R., Luciani, J., et al. 2011. DNA methylation profiling reveals a predominant immune component in breast cancers. *EMBO Mol Med* 3:726-741.
5. Price, M.E., Cotton, A.M., Lam, L.L., Farre, P., Emberly, E., Brown, C.J., Robinson, W.P., and Kobor, M.S. 2013. Additional annotation enhances potential for biologically-relevant analysis of the Illumina Infinium HumanMethylation450 BeadChip array. *Epigenetics Chromatin* 6:4.
6. Dedeurwaerder, S., Defrance, M., Calonne, E., Denis, H., Sotiriou, C., and Fuks, F. 2011. Evaluation of the Infinium Methylation 450K technology. *Epigenomics* 3:771-784.
7. Dedeurwaerder, S., Defrance, M., Bizet, M., Calonne, E., Bontempi, G., and Fuks, F. 2014. A comprehensive overview of Infinium HumanMethylation450 data processing. *Brief Bioinform* 15:929-941.
8. Ruffell, B., Au, A., Rugo, H.S., Esserman, L.J., Hwang, E.S., and Coussens, L.M. 2012. Leukocyte composition of human breast cancer. *Proc Natl Acad Sci U S A* 109:2796-2801.
9. Mahmoud, S.M., Paish, E.C., Powe, D.G., Macmillan, R.D., Grainge, M.J., Lee, A.H., Ellis, I.O., and Green, A.R. 2011. Tumor-infiltrating CD8+ lymphocytes predict clinical outcome in breast cancer. *J Clin Oncol* 29:1949-1955.
10. Seo, A.N., Lee, H.J., Kim, E.J., Kim, H.J., Jang, M.H., Lee, H.E., Kim, Y.J., Kim, J.H., and Park, S.Y. 2013. Tumour-infiltrating CD8+ lymphocytes as an independent predictive factor for pathological complete response to primary systemic therapy in breast cancer. *Br J Cancer* 109:2705-2713.
11. Bates, G.J., Fox, S.B., Han, C., Leek, R.D., Garcia, J.F., Harris, A.L., and Banham, A.H. 2006. Quantification of regulatory T cells enables the identification of high-risk breast cancer patients and those at risk of late relapse. *J Clin Oncol* 24:5373-5380.
12. Gu-Trantien, C., Loi, S., Garaud, S., Equeter, C., Libin, M., de Wind, A., Ravoet, M., Le Buanec, H., Sibille, C., Manfouo-Foutsop, G., et al. 2013. CD4(+) follicular helper T cell infiltration predicts breast cancer survival. *J Clin Invest* 123:2873-2892.
13. Peng, H., Long, F., and Ding, C. 2005. Feature selection based on mutual information: criteria of max-dependency, max-relevance, and min-redundancy. *IEEE Trans Pattern Anal Mach Intell* 27:1226-1238.
14. Liu, X.Y., Wu, J., and Zhou, Z.H. 2009. Exploratory undersampling for class-imbalance learning. *IEEE Trans Syst Man Cybern B Cybern* 39:539-550.



15. Du, P., Zhang, X., Huang, C.C., Jafari, N., Kibbe, W.A., Hou, L., and Lin, S.M. 2010. Comparison of Beta-value and M-value methods for quantifying methylation levels by microarray analysis. *BMC Bioinformatics* 11:587.
16. Little, R. 1988. Missing data adjustments in large surveys. *J Bus Econ Stat* 6:287-296.
17. Carpenter, J. 2007. Missing data in randomised controlled trials — a practical guide [Internet]. Available from: <http://www.hta.nhs.uk/nihrmethodology/reports/1589.pdf>.

### 3. SUPPLEMENTAL FIGURES

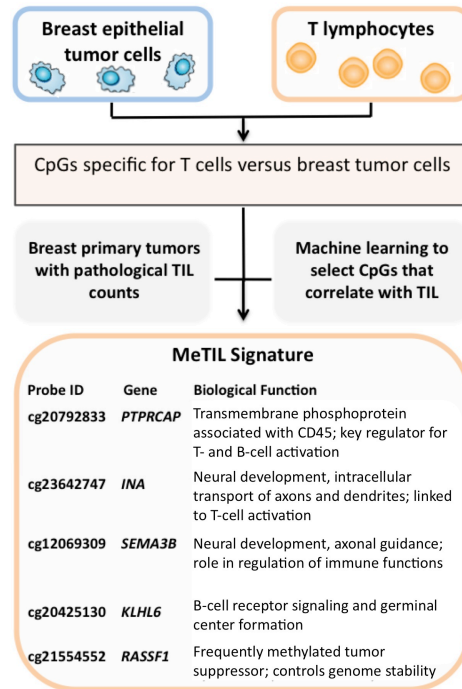

**eFigure 1. Development of the MeTIL signature.** MeTIL markers were identified in the following steps: 1) Filtering for T-cell-associated probes (CpG) from genome-wide DNA methylation profiles (Infinium Methylation) that are highly differentially methylated ( $\Delta \text{Beta} < -0.8$ ) between T-lymphocytes and breast epithelial cells. 2) Applying a random forest machine learning approach on DNA methylation profiles (Infinium HumanMethylation) from 105 breast primary tumors (cohort 1) for which H&E staining-based PaTIL were available to select for markers from our list of T-cell-associated CpGs that predicts most accurately the quantity of PaTIL in patient samples. The final signature included five markers and was named ‘MeTIL’ (Methylation of TIL) signature.

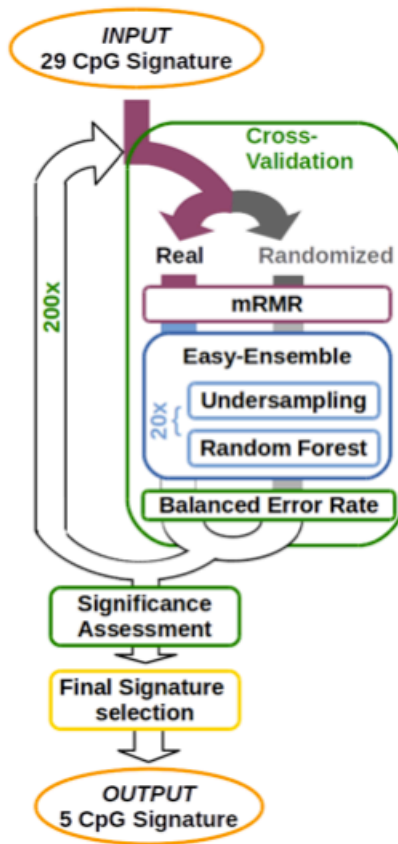

**eFigure 2. Machine learning approach.** Selecting the final markers of the MeTIL signature for quantification of TILs from the list of differential methylated markers between breast cells and T-lymphocytes by applying a random forest machine learning approach on cohort 1 (n = 105) for which PaTIL were available.

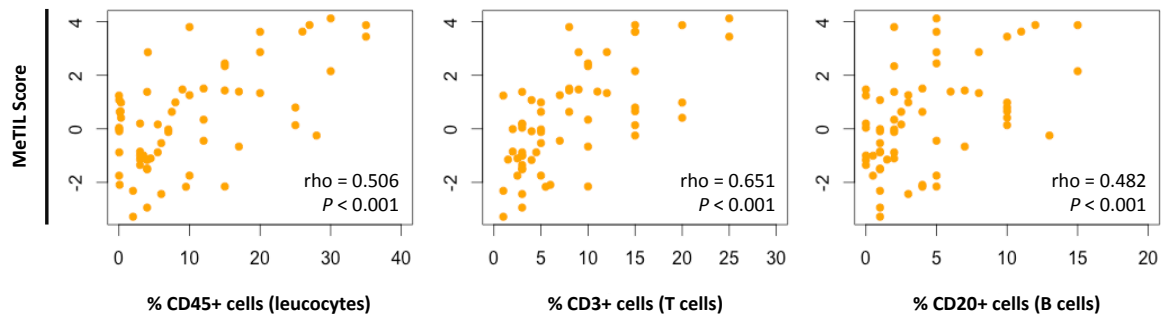

**eFigure 3. MeTIL score correlates with IHC-based TIL counts.** The MeTIL signature was transformed into a score and correlated with % of CD45+ (total leucocytes), CD3+ (total T-cells) and CD20+ (total B-cells) cells obtained by IHC staining in 61 samples of cohort 1. The MeTIL score values are plotted on the y-axis and % of CD45+, CD3+ and CD20+ cells on the x-axis. The correlation was assessed with a Spearman's rank correlation test. The Spearman's rank correlation coefficient (rho) and its p value are displayed for each plot.

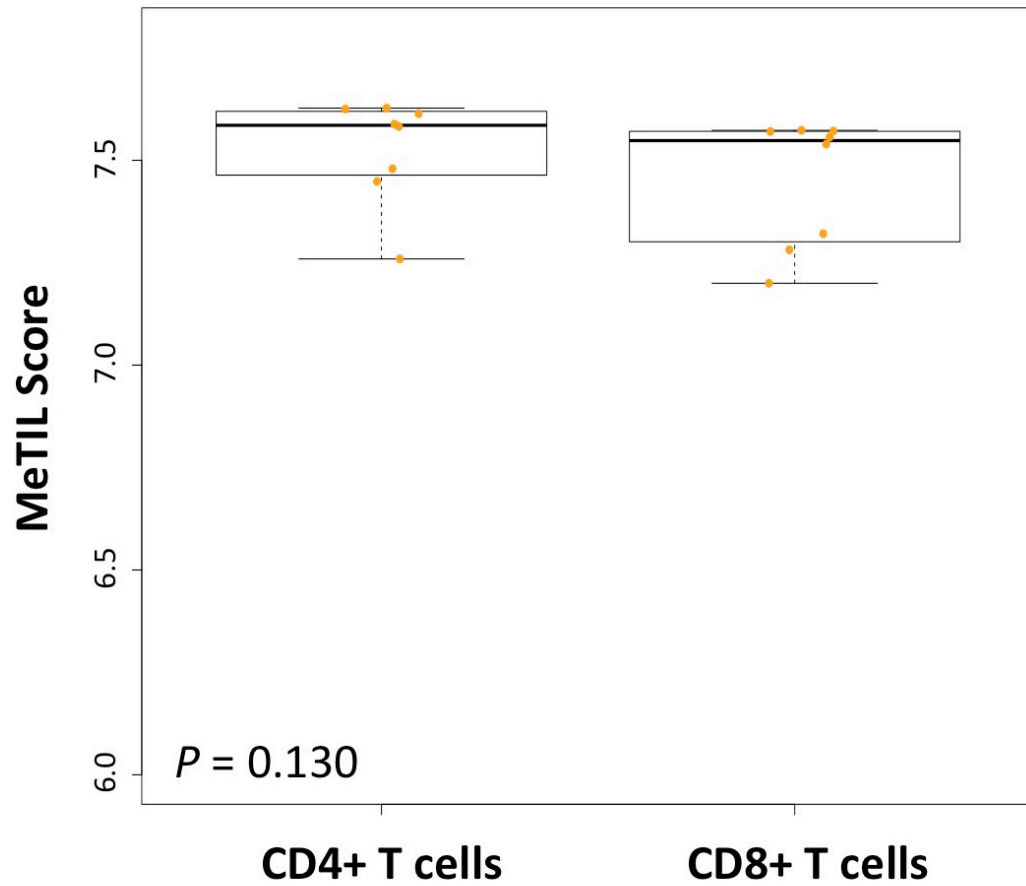

**eFigure 4. MeTIL score values in T-cell subsets.** MeTIL scores were computed in CD4+ or CD8+ T-cells sorted from eight whole blood samples. Differences between the MeTIL score of groups were assessed with a Student's t-test. P value is displayed in the lower, left corner of the plot.

**A**

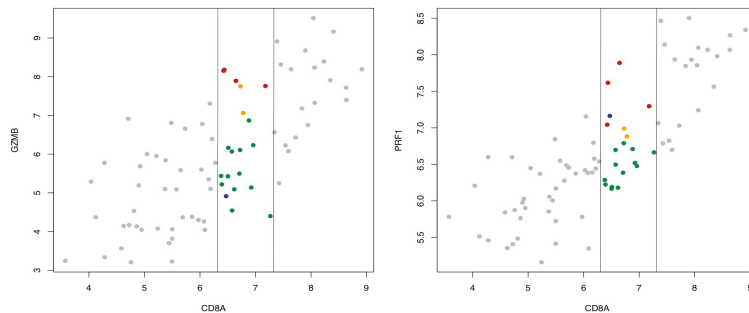

**B**

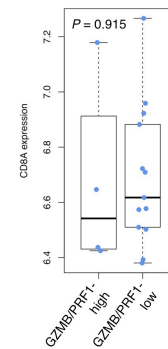

**eFigure 5. MeTIL score reflects functionality of CTLs. A)** Scatter plots displaying expression of *GZMB* and *CD8A* (left plot) and *PRFI* and *CD8A* (right plot) in samples of cohort 1. Note the linear correlation between *GZMB* and *CD8A* and *PRFI* and *CD8A*. In order to select for tumors enriched for functional or non-functional CTLs, we included tumors with *CD8A* log2 RNA-seq expression levels between 6.3 and 7.3 to assure the selection of tumors with comparable high levels of CTLs. The *CD8A* expression range was kept narrow to define groups of CTL-enriched tumors with high or low expression of *GZMB* and *PRFI* that was not confounded by expression of *CD8A*. The *CD8A* expression window was chosen based on the following criteria: 1) sufficiently high *CD8A* level to select for tumors enriched in CTLs, 2) not more than 1 log of expression between the beginning and end of window border to assure that samples have comparable level of CTLs and 3) the window with the largest range in expression of *GRZMB* and *PRFI* expression was chosen to define functional and non-functional CTLs. Red dots show samples with high expression of both *GZMB* and *PRFI* and green dots show samples with low expression of both *GZMB* and *PRFI*. Blue and yellow dots show samples in which the expression of *GZMB* and *PRFI* differed. Red-labeled samples were selected for the ‘GZMB/PRFI-high group’ and green samples for the ‘GZMB/PRFI-low’ group. **B)** Expression of *CD8A* in the ‘GZMB/PRFI-high’ and the ‘GZMB/PRFI-low’ group. Differences of *CD8A* expression between groups were assessed with Student’s t- test. P value is displayed in the upper, left corner of the plot.

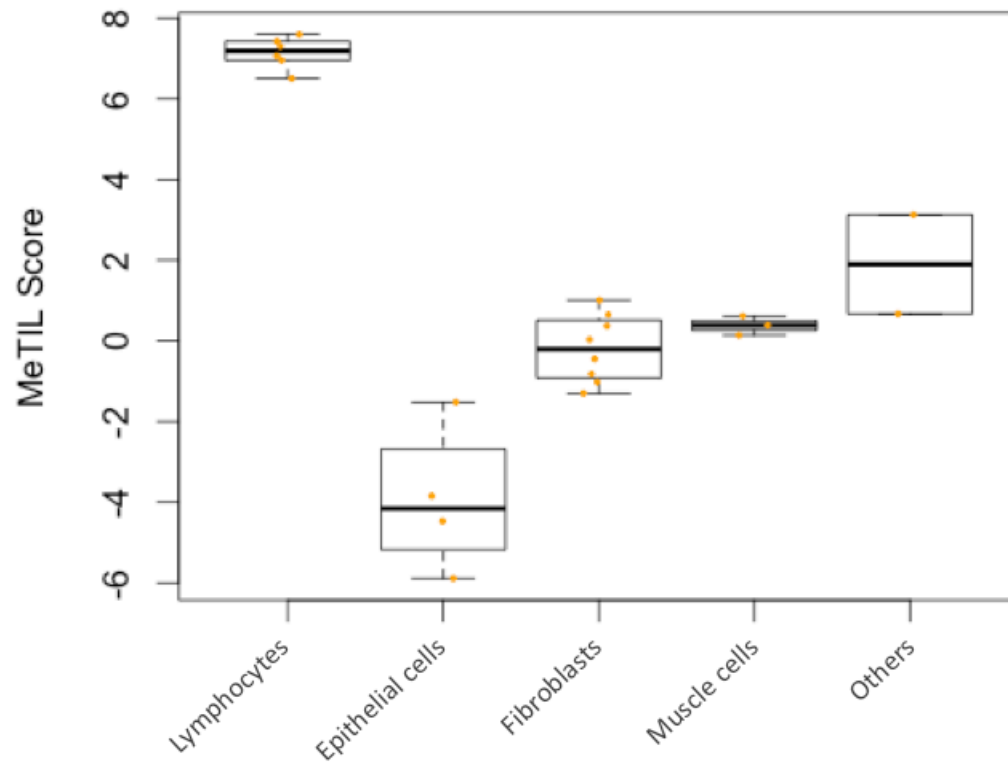

**eFigure 6. MeTIL score values differ between cell types of the tumor microenvironment.** The MeTIL score was computed for various samples from the ENCODE Consortium that represent different cell types typically found in a breast tumor biopsy. The MeTIL score values are plotted on the y-axis and the groups of cell types on the x-axis. The group ‘Others’ contains one sample classified as ‘endothelial cells’ and one sample classified as ‘adipocytes’. Note, the MeTIL score displays highest values in lymphocytes as compared to other cell types fortifying its specificity for TIL evaluation.

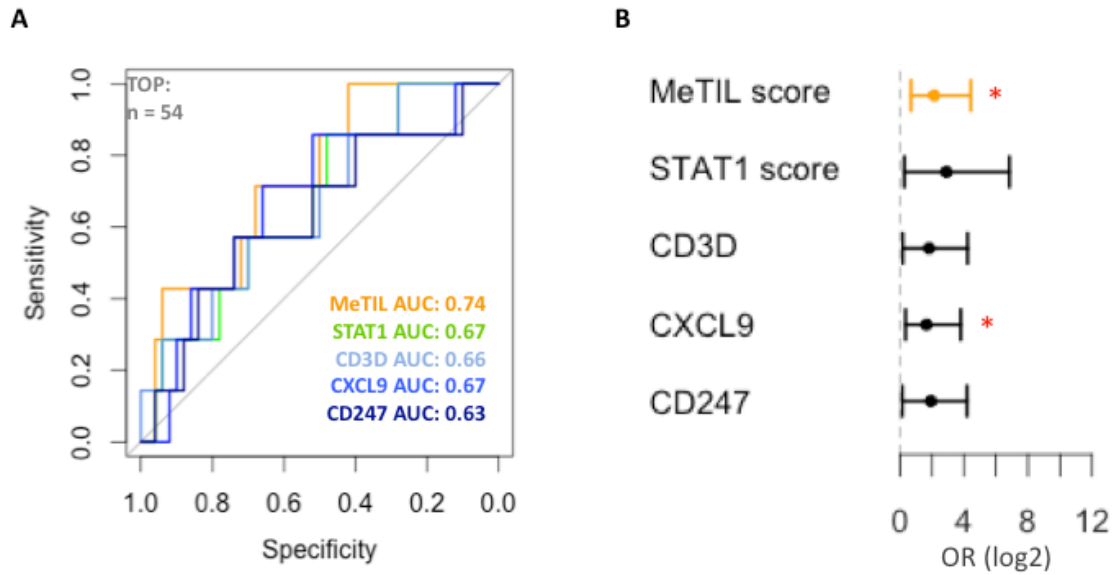

**eFigure 7. Predictive values of the MeTIL score or gene expression-based immune markers for response to preoperative anthracycline treatment. A)** ROC curves for prediction of response to neoadjuvant anthracycline treatment based on the MeTIL score (orange) or gene expression-based immune markers (other colors) in 54 patients of the TOP cohort. **B)** Forest plot showing the log2 value of the odds ratios (OR) and CI of the MeTIL score (orange) or gene expression-based immune markers (black) for prediction of response to neoadjuvant anthracycline treatment in the TOP cohort. A red star indicates statistical significance ( $p < 0.05$ ).



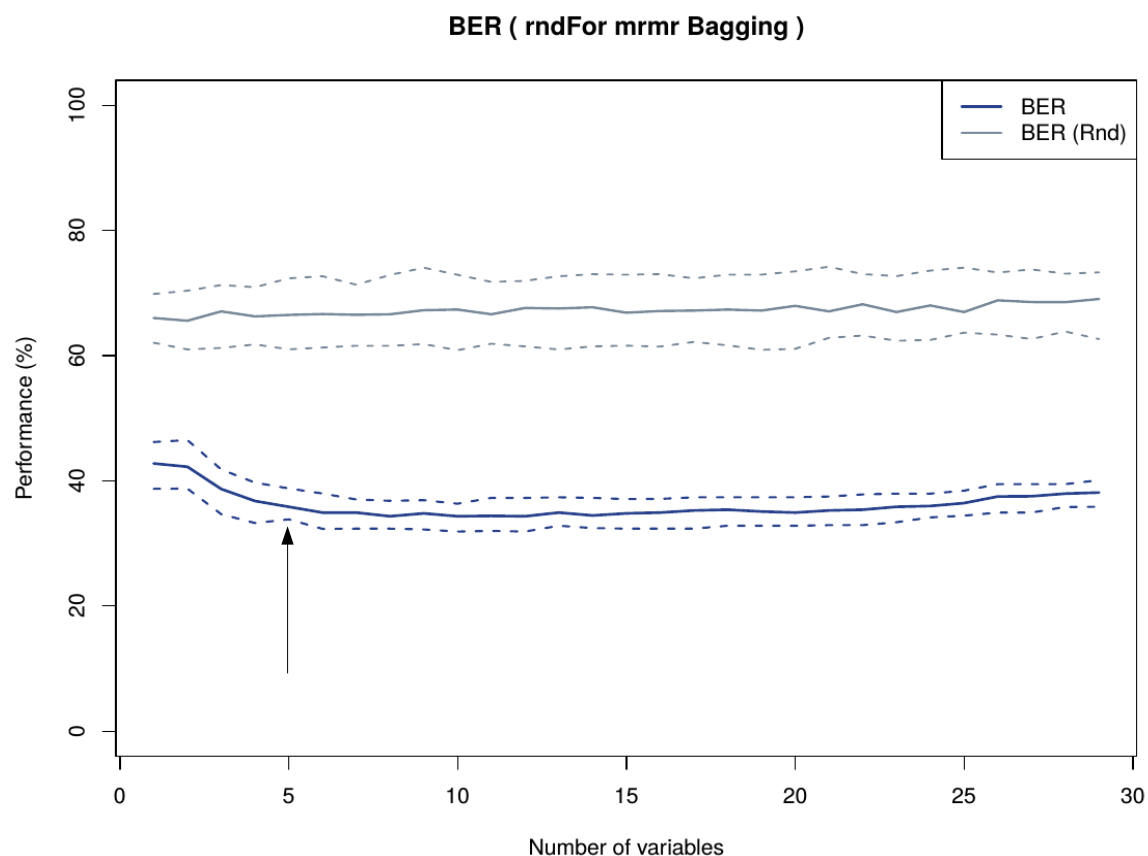

**eFigure 8. Balanced-Error Rate.** The performance of the developed random forest machine learning models was assessed through ‘Balanced-Error Rates’ (BERs) in a three-fold cross validation utilizing signature sizes ranging from a single cytosine to the entire set of T-lymphocyte-specific cytosines. The signature size, for which no more improvement of the BER was observed (five features signature size), was selected as the final model.

#### 4. SUPPLEMENTAL TABLES

**eTable 1. Probe information for T-cell-associated markers.**

| Ilmn ID    | Corresponding gene | Full name                                                         | mRNA ID RefSeq                        | Cytosine position hg19 | Surrounding sequence                                                                                                                                 |
|------------|--------------------|-------------------------------------------------------------------|---------------------------------------|------------------------|------------------------------------------------------------------------------------------------------------------------------------------------------|
| cg00777121 | RASSF1             | Homo sapiens Ras association (RalGDS/AF-6) domain family member 1 | NM_007182;<br>NM_170714               | chr3:50378191          | GCGCGATGCGCAGCGCGTTGG<br>CACGCTCCAGCCGGGTGCGGC<br>CCTTCCCAGCGCGCCAG[CG]<br>GGTGCCAGCTCCCGCAGCTCA<br>ATGAGCTCAGGCTCCCCGCAG<br>ATGGCCCCGTTGGGCCCCG     |
| cg04396791 | SHANK2             | Homo sapiens SH3 and multiple ankyrin repeat domains 2            | NM_012309;<br>NM_133266               | chr11:70508180         | GGCAAAGAAAGTAAGTGGCCC<br>GAACGGCGGGCGGCGGCAGCG<br>CGGGCCTCAGCAGCGCGGG[CG]<br>G]TCGGGAATGAGCTCCTCCGG<br>CTTGTCCCGACCACACGCATCT<br>TCCAGGGAAGCCCCGGGAA |
| cg05596756 | FAM113B            | Homo sapiens PC-esterase domain containing 1B                     | NM_138371;<br>NM_138371;<br>NR_026544 | chr12:47610220         | GACTTACCATTTCATGTTTTCAC<br>ACATGTCAAAGTCTTGAAGCTT<br>CGGTCAATTAGTCTTC[CG]CTTC<br>CTAAAGCAAGAACTAAATGCT<br>GACTTGTGTCGTTTGCCCCAGA<br>TGCCACCGGAAA     |
| cg06151165 | VSX1               | Homo sapiens visual system homeobox 1                             | NM_014588;<br>NM_199425               | chr20:25062254         | CCGCCTAGATCTGGGCCGCTG<br>GGGCCAGGGGTGCGGTGGGG<br>CGATGGTCTGTGACCCCTG[CG]<br>JCGGCTCAGAGCCTAGGGGACA<br>GGGGCAGGAGCGGAAAGCGC<br>GGGCCTGATTACCGGACGT    |
| cg06825142 | DRD4               | Homo sapiens dopamine receptor D4                                 | NM_000797                             | chr11:637170           | CGTGCCCGTCTCTCCCTGCGC<br>AAAATTCCAAGATGAGCAAATA<br>CTGGGCTCACGGTGGAG[CG]C<br>CGCGGGGGCCCCCTGAGCC<br>GGGGCGGGTCTGGGGGCGGGA<br>CCAGGGTCCGGCCGGGGCG     |
| cg07380416 | CD6                | Homo sapiens CD6 molecule                                         | NM_006725                             | chr11:60739172         | TGCAGACCAAAACCACAAGCA<br>GAACAAGCAGGCGTGAGACAC<br>TCACAGGTTGGGTTTGAT[CG]C<br>ATGCGTGTGCGAGAGGAGAGA<br>GCAGAGAGAGACACAGGAACA<br>AGAACAGCAAAGGGTAG     |
| cg07498879 | OSM                | Homo sapiens oncostatin M                                         | NM_020530                             | chr22:30663041         | AATGGGCGCAGGGCGCGGTGT<br>ATGCCCGCTCCTCCTCCTGTTT<br>TCTTCAATTGTTCTT[CG]AG<br>GTCAGCCCTACGCCAAGGAT<br>GATGTAAAACCGCAGCCTCAG<br>CCTTCCTAGGGTGAGT        |

|            |        |                                                                                                     |                             |                |                                                                                                                                                  |
|------------|--------|-----------------------------------------------------------------------------------------------------|-----------------------------|----------------|--------------------------------------------------------------------------------------------------------------------------------------------------|
| cg08047457 | RASSF1 | Homo sapiens Ras association (RalGDS/AF-6) domain family member 1                                   | NM_007182;<br>NM_170714     | chr3:50378413  | AAGGAGCTGAGGAGAGCCGCG<br>CAATGGAAACCTGGGTGCAGG<br>GACTGTGGGGCCCCAAGG[CG]<br>GGGCTGGGCGCGCTCTCGCAG<br>AGCCCCCCCCGCTTGCCCTT<br>CCTTCCCTCCTTCGTCCC  |
| cg09902130 | CD6    | Homo sapiens CD6 molecule                                                                           | NM_006725                   | chr11:60739178 | CCAAAACCACAAGCAGAACAAG<br>CAGGCGTGAGACACTCACAGG<br>TTGGGTTTGATCGCATG[CG]TG<br>TCGGAGAGGAGAGAGCAGAGA<br>GAGACACAGGAACAAGAACAG<br>CAAAGGGTAGAGCAGA |
| cg10590292 | BIN2   | Homo sapiens bridging integrator 2                                                                  | NM_016293                   | chr12:51717674 | TCTCTCCAATCTGCCAGTTTTT<br>ATGGAAGCCCACTCCTCGCTC<br>CCGTTTCCCTGGGAGAG[CG]G<br>GAGACCTTCTCGTCAGCCCA<br>GACCTTCGGGGCCCCCTGAGC<br>ACCCTGCCGCCCTCC    |
| cg12069309 | SEMA3B | Homo sapiens sema domain, immunoglobulin domain, secreted, (semaphorin) 3B domain (lg), short basic | NM_00100591<br>4; NM_004636 | chr3:50312913  | GGGGTCGCGTGACGCGCTTC<br>CAGCCAGTGCCAAGAGGTGG<br>GCGGGGTCGGGGTTGGGC[CG]<br>CCGGGAGGGAGGCGAAGGGT<br>CTTTCAGTCCCCGGGGCTGAA<br>AGAAGGGCTCACAGAAGAT   |
| cg13470920 | VAV1   | Homo sapiens vav 1 guanine nucleotide exchange factor                                               | NM_005428                   | chr19:6772831  | TGGTGGAGGCTGCGAGGGTGC<br>ACGGCCGGCCCTGGGCAGGC<br>GGTAGCCATGGAGCTGTGG[CG]<br>CCAATGCACCCACTGGCTCAT<br>CCAGTGCCGGGTGCTGCCGCC<br>CAGCCACCGCGTGACCTG |
| cg14519350 | OSM    | Homo sapiens oncostatin M                                                                           | NM_020530                   | chr22:30661949 | ACCGCTCACCACCACCCCCAA<br>CGGGGCACCGGCAGCCACGTG<br>GTCGGAAGGGCCTATGG[CG]<br>CAATGGCCCGGAAGGCAGTGA<br>CACCATCGTTCCTCCTAAGA<br>ACCATCCGGCCCTTTGG    |
| cg16158681 | MT3    | Homo sapiens metallothionein 3                                                                      | NM_005954                   | chr16:56623109 | CAGGGAAGAGCTGGGAAATAC<br>GCAAAGCGCCTTTTCTCCACT<br>TTCGGAGATGGTACGTG[CG]C<br>GCTTCCACGCAGTGGCGGCTG<br>CTGCGGCGAGCACGTCCCCTG<br>CGGGACCCACGCGGGGA  |
| cg16509569 | HEM1   | Homo sapiens NCK-associated protein 1-like                                                          | NM_005337                   | chr12:54891634 | ATGTCTTTGACATCTGCTTACC<br>AGCATAAATTAGCAGAGAAGCT<br>CACTATCCTGAATGAT[CG]CGG<br>TCAGGGGGTTCTCATCCGTATG<br>TATAACATCAAGAAGGTAAGCA<br>TGAACAATGGGAC |
| cg17078393 | LCK    | Homo sapiens lymphocyte-specific protein tyrosine kinase                                            | NM_005356                   | chr1:32717002  | AATGGGGCCAGAGGGCTCCCG<br>GGCTGGGCAGGTAAGGAGCGC<br>TGGTATTGGGGGCGCAGG[CG]<br>CCGGGGTGAGAGGCCTGATAG<br>CAGACGGCTGCAGCTGTGCGG                       |

|            |         |                                                                                |                                                                       |                     |                                                                                                                                                  |
|------------|---------|--------------------------------------------------------------------------------|-----------------------------------------------------------------------|---------------------|--------------------------------------------------------------------------------------------------------------------------------------------------|
|            |         |                                                                                |                                                                       |                     | GCCCAGGCTCCCTAGGGA                                                                                                                               |
| cg17518965 | EDG6    | Homo sapiens sphingosine-1-phosphate receptor 4                                | NM_003775                                                             | chr19:3178955       | GGCCGGGCGCGGGGGGCCGG<br>AGGATGGCGGCCTGGGGGCC<br>CTGCGGGGCTGTGGGTGGC[<br>CG]CCAGCTGCCTGGTGGTGCT<br>GGAGAACTTGCTGGTGCTGGC<br>GGCCATCACCAGCCACATGC  |
| cg20425130 | KLHL6   | Homo sapiens kelch-like family member 6                                        | NM_130446                                                             | chr3:183273245      | TGGCAGGAGAATTCTGAATGT<br>CCACACACAAGATGACATCTGT<br>CAGAGCGTTTTCCATT[CG]CAG<br>GGTTTCCAGGCCATTCTGAAGA<br>ATTAAGGAGAGTCCCGCGTCG<br>TCAAATTTGACCTT  |
| cg20622019 | ADA     | Homo sapiens adenosine deaminase                                               | NM_000022                                                             | chr20:43279793      | TTCTTCCCCGGGGCGCATCCA<br>CAAACCTGAGCTCCTTGGCGCT<br>CACCACCATAACGCTGG[CG]TA<br>CAAAGCTGCTTCCATTCACTGA<br>GCACTCAGTAGGCGCCGGGCA<br>CAGCACTAGGTGCCT |
| cg20792833 | PTPRCAP | Homo sapiens protein tyrosine phosphatase, receptor type, C-associated protein | NM_005608                                                             | chr11:67205195      | GCTGTGTCGAGCGAGAAGTGA<br>GCTCAGTGCTCGTCTGCAGTG<br>AAGGGTGGCCCAGGCTTC[CG]<br>CTTCCTGCCCACATACCCACC<br>TGCCCCCTCCCTGCTGCAGGAC<br>CCCTGGTCCACACCAGA |
| cg21554552 | RASSF1  | Homo sapiens Ras association (RalGDS/AF-6) domain family member 1              | NM_007182;<br>NM_170714                                               | chr3:50378425       | AGAGCCGCGCAATGGAACCT<br>GGGTGCAGGGACTGTGGGGCC<br>CGAAGGCGGGGCTGGGCG[CG]<br>]CTCTCGCAGAGCCCCCCCCGC<br>CTTGCCCTTCCTTCCTCCTTC<br>GTCCCCCTCCTCACACCC |
| cg23093496 | Clorf54 | Homo sapiens chromosome 16 open reading frame 54                               | NM_175900                                                             | chr16:29757323      | TAGAGCCACTCTTCCTGGTGCT<br>GGACTAAGAGGTGCAGGCTTG<br>GAGGGTGCAGGGCGGTC[CG]C<br>CTCTCAGACGTAGAGGCCCGG<br>CCTCGGATGAAGGCGAAGGG<br>AGGGCACCGCCTGTTGC  |
| cg23642747 | INA     | Homo sapiens internexin neuronal intermediate filament protein, alpha          | NM_032727                                                             | chr10:10503664<br>5 | GGGATGCGACAGAGCTGTGTG<br>GTTTCCGGATGGGAAACCTCA<br>GTCGTTTAGGCACCCCTC[CG]C<br>TCGAGTCACTTCCGAAGCAGTC<br>GATTCTTGGGGAGAAGCGCTG<br>CGGAAAGGGGCGACTC |
| cg23797100 | LAT     | Homo sapiens linker for activation of T cells                                  | NM_00101498<br>9;<br>NM_00101498<br>7; NM_014387;<br>NM_00101498<br>8 | chr16:28996053      | GCGACTGAGATGGGGGACTGC<br>TCTTCTCCGAGTGAGCTGGCTG<br>AGTGTGACCGTGAGTCA[CG]C<br>CCCTGCTTCCCTGGAGCCTGT<br>CCCTTGCCTCACAGGCCTGGC<br>TGAGGTGGGGGTGGGCA |
| cg24545967 | SH2D3C  | Homo sapiens SH2 domain containing 3C                                          | NM_170600                                                             | chr9:130540941      | CTGGTCTTCTTGGTCCCCTCTG<br>TCATCTTGGCAAATTGTGTGAA<br>GCCCTTGGCCAGCTTG[CG]AG<br>TGGCCACTCAAGGCTCGGGAC                                              |

|            |          |                                                            |                         |                 |                                                                                                                                                   |
|------------|----------|------------------------------------------------------------|-------------------------|-----------------|---------------------------------------------------------------------------------------------------------------------------------------------------|
|            |          |                                                            |                         |                 | ATCAAAGTTGAGGTGCCTCTCC<br>CACCTCCCCTTCCCC                                                                                                         |
| cg24841244 | CD3D     | Homo sapiens CD3d molecule, delta (CD3-TCR complex)        | NM_001040651; NM_000732 | chr11:118213330 | TGCGAGAGAAGGGTAGCCAGT<br>ACCAGGCCAGAGAGAAACGTG<br>CTATGTTCCATCTCCCAG[CG]G<br>AACTCATCCAGTAGATAAAGCC<br>AGGTCACCGAACTATCAGCCTG<br>GGTGAGAGCTGCCCT  |
| cg26285698 | Cl6orf54 | Homo sapiens chromosome 16 open reading frame 54           | NM_175900               | chr16:29757334  | TTCCTGGTGCTGGACTAAGAG<br>GTGCAGGCTTGGAGGGTGCAG<br>GGCGGTCCGCCTCTCAGA[CG]<br>TAGAGGCCCGGCCCTCGGATGA<br>AGGCGGAAGGGAGGGCACCG<br>CCTGTTGCTGGGCAACTGT |
| cg27377213 | PPP1R16B | Homo sapiens protein phosphatase 1, regulatory subunit 16B | NM_015568               | chr20:37433803  | TACGACCACTTCCTTCCTCCAG<br>CGCTTCACCTCCCTTCTTTCCA<br>GAAAGAGGAAATGATG[CG]AGT<br>CCACACCGCAGGCCACAGCCC<br>CCATGTCTCGGCCCCAGCAGC<br>TGGGGGACCTGGCCC  |
| cg27652350 | ALDH1A3  | Homo sapiens aldehyde dehydrogenase 1 family, member A3    | NM_000693               | chr15:101420989 | GCCTCCTCGCTCTGTGGGCTG<br>GGAGGCTACAGCGTTGGCAGA<br>ACGCGCAGATTACCTGCC[CG]<br>GGGCAGAAAGGAATAAAGAA<br>GATGGTGAGGCCTCCGAGGCC<br>TCTGAGCTGGGGCTGAGG   |

NOTE: For each marker the following information is provided: Illumina array ID (Ilmn ID), gene symbol of the corresponding gene (Corresponding gene), full name of the corresponding gene (Full name), mRNA ID of corresponding gene transcript based on RefSeq database (mRNA ID RefSeq), chromosomal position of the target cytosine based on hg19 (Cytosine position hg19) and the sequence surrounding of target cytosine (Surrounding sequence).

**eTable 2. Clinical data for cohort 1.**

| Sample Name | Subtype IHC | iTU-Ly | str-Ly | Grade | Size cm | Nodal Status | ER IHC | HER2 IHC | Age Diagnosis | RFS event | RFS time | RFS event censored | RFS time censored | OS event | OS time |
|-------------|-------------|--------|--------|-------|---------|--------------|--------|----------|---------------|-----------|----------|--------------------|-------------------|----------|---------|
| BC102       | HER2        | 5      | 10     | 3     | 5       | 1            | 0      | 1        | 52,94         | 0         | 13,42    | 0                  | 10                | 0        | 13,42   |
| BC11        | Basal       | 1      | 5      | 3     | 2,2     | 0            | 0      | 0        | 52,64         | 0         | 8,32     | 0                  | 8,32              | 0        | 8,32    |
| BC116       | Basal       | 0      | 0      | 3     | 3,7     | 0            | 0      | 0        | 57,32         | 0         | 9,78     | 0                  | 9,78              | 0        | 9,78    |
| BC124       | Basal       | 10     | 40     | 3     | 1,7     | 0            | 0      | 0        | 53,7          | 0         | 6,19     | 0                  | 6,19              | 0        | 6,19    |
| BC18        | Basal       | 5      | 60     | 3     | 2.8+1.5 | 0            | 0      | 0        | 59,56         | 0         | 9,45     | 0                  | 9,45              | 0        | 9,45    |
| BC24        | LumB        | 50     | 20     | 3     | 3,4     | 0            | 1      | 0        | 53,78         | 0         | 8,84     | 0                  | 8,84              | 0        | 8,84    |
| BC28        | Basal       | 40     | 20     | 3     | 2,9     | 0            | 0      | 0        | 49,61         | 1         | 0,51     | 1                  | 0,51              | 1        | 4,99    |
| BC34        | Basal       | 2      | 5      | 3     | 1,5     | 0            | 0      | 0        | 37,66         | 1         | 3,34     | 1                  | 3,34              | 0        | 7,37    |
| BC35        | Basal       | 90     | 10     | 3     | 2,5     | 1            | 0      | 0        | 54,16         | 1         | 0        | 1                  | 0                 | 0        | 7,81    |
| BC37        | Basal       | 70     | 0      | 3     | 2,8     | 0            | 0      | 0        | 51,95         | 0         | 7,84     | 0                  | 7,84              | 0        | 7,84    |
| BC45        | Basal       | 10     | 20     | 3     | 0,9     | 0            | 0      | 0        | 54,86         | 0         | 7,16     | 0                  | 7,16              | 0        | 7,16    |
| BC49        | LumB        | 0      | 0      | 3     | 1,6     | 0            | 1      | 0        | 60,46         | 0         | 6,71     | 0                  | 6,71              | 0        | 6,71    |
| BC51        | Basal       | 30     | 10     | 3     | 2       | 0            | 0      | 0        | 73,69         | 1         | 5,01     | 1                  | 5,01              | 0        | 6,55    |
| BC56        | Basal       | 5      | 50     | 3     | 3,9     | 1            | 0      | 0        | 36,17         | 0         | 6,2      | 0                  | 6,2               | 0        | 6,2     |
| BC57        | Basal       | 0      | 0      | 3     | 1,8     | 0            | 0      | 0        | 48,7          | 0         | 6,21     | 0                  | 6,21              | 0        | 6,21    |
| BC6         | HER2        | NA     | NA     | 3     | 1,5     | 0            | 0      | 1        | 35,86         | 0         | 7,21     | 0                  | 7,21              | 0        | 7,21    |

|       |       |    |    |   |      |   |   |   |       |   |       |   |      |   |       |
|-------|-------|----|----|---|------|---|---|---|-------|---|-------|---|------|---|-------|
| BC62  | HER2  | 0  | 0  | 3 | 2,7  | 0 | 1 | 1 | 33,44 | 1 | 2,63  | 1 | 2,63 | 1 | 6,45  |
| BC67  | Basal | 50 | 80 | 2 | 1,4  | 1 | 0 | 0 | 32,16 | 0 | 14,08 | 0 | 10   | 0 | 14,08 |
| BC7   | Basal | 40 | 80 | 3 | 2,2  | 0 | 0 | 0 | 65,42 | 1 | 7,01  | 1 | 7,01 | 0 | 8,19  |
| BC73  | Basal | 10 | 30 | 3 | 1,7  | 1 | 0 | 0 | 75,13 | 0 | 5,74  | 0 | 5,74 | 0 | 5,74  |
| BC80  | Basal | 30 | 90 | 3 | 1,1  | 0 | 0 | 0 | 53,98 | 1 | 2,05  | 1 | 2,05 | 1 | 5,33  |
| BC95  | Basal | 50 | 80 | 3 | 2,5  | 1 | 0 | 0 | 56,55 | 1 | 1,48  | 1 | 1,48 | 1 | 1,92  |
| BC1   | HER2  | 0  | 10 | 3 | 2,2  | 1 | 0 | 1 | 74,94 | 1 | 0,93  | 1 | 0,93 | 0 | 8,28  |
| BC10  | HER2  | 5  | 20 | 3 | 5,1  | 1 | 0 | 1 | 50,12 | 0 | 2,12  | 0 | 2,12 | 1 | 2,52  |
| BC108 | HER2  | 0  | 30 | 3 | 2,6  | 1 | 0 | 1 | 55,22 | 1 | 0,74  | 1 | 0,74 | 1 | 0,87  |
| BC112 | HER2  | NA | NA | 3 | 6    | 0 | 0 | 1 | 47,82 | 1 | 10,22 | 0 | 10   | 0 | 10,82 |
| BC113 | HER2  | 0  | 5  | 3 | 3    | 1 | 0 | 1 | 64,83 | 1 | 3,94  | 1 | 3,94 | 0 | 1,21  |
| BC121 | HER2  | 0  | 10 | 3 | >4.5 | 1 | 1 | 1 | 52,35 | 1 | 2,65  | 1 | 2,65 | 0 | 5,58  |
| BC122 | HER2  | 0  | 10 | 3 | 3    | 0 | 0 | 1 | 69,25 | 1 | 0,64  | 1 | 0,64 | 1 | 3,55  |
| BC2   | HER2  | 0  | 0  | 3 | 4,8  | 1 | 0 | 1 | 59,79 | 1 | 1,22  | 1 | 1,22 | 1 | 3,39  |
| BC27  | HER2  | 20 | 30 | 3 | 2,1  | 1 | 1 | 1 | 53,66 | 0 | 1,85  | 0 | 1,85 | 0 | 1,85  |
| BC3   | HER2  | 0  | 70 | 3 | 1,8  | 1 | 0 | 1 | 52,58 | 0 | 8,64  | 0 | 8,64 | 0 | 8,64  |
| BC39  | HER2  | 20 | 10 | 3 | 10   | 1 | 1 | 1 | 65,32 | 1 | 3,38  | 1 | 3,38 | 1 | 5,28  |
| BC42  | HER2  | 0  | 0  | 3 | 3,5  | 1 | 0 | 1 | 47,75 | 1 | 0     | 1 | 0    | 0 | 7,63  |
| BC50  | HER2  | NA | NA | 3 | 2,5  | 0 | 1 | 1 | 70,34 | 0 | 6,36  | 0 | 6,36 | 0 | 6,36  |
| BC66  | HER2  | 0  | 0  | 3 | 2,1  | 1 | 1 | 1 | 49,18 | 0 | 0,56  | 0 | 0,56 | 1 | 1,97  |

|       |       |    |    |   |         |   |    |   |       |   |       |   |      |   |       |
|-------|-------|----|----|---|---------|---|----|---|-------|---|-------|---|------|---|-------|
| BC68  | HER2  | NA | NA | 3 | 1,6     | 0 | 1  | 1 | 66,72 | 0 | 6,17  | 0 | 6,17 | 0 | 6,17  |
| BC78  | HER2  | 50 | 30 | 3 | 1,6     | 1 | 0  | 1 | 50,29 | 1 | 1,08  | 1 | 1,08 | 1 | 1,58  |
| BC79  | HER2  | 10 | 90 | 3 | 2,2     | 1 | 0  | 1 | 45,98 | 0 | 5,43  | 0 | 5,43 | 0 | 5,43  |
| BC85  | HER2  | 50 | 80 | 2 | 2,5     | 1 | NA | 1 | 63,61 | 0 | 13,96 | 0 | 10   | 0 | 13,96 |
| BC86  | HER2  | 0  | 10 | 3 | 3       | 0 | 0  | 1 | 46,95 | 0 | 13,39 | 0 | 10   | 0 | 13,39 |
| BC92  | HER2  | 0  | 0  | 2 | 3       | 1 | 0  | 1 | 76,43 | 1 | 2,09  | 1 | 2,09 | 1 | 5,89  |
| BC94  | HER2  | 0  | 5  | 3 | 3,5     | 1 | 0  | 1 | 43,96 | 1 | 8,67  | 1 | 8,67 | 1 | 11,32 |
| BC101 | LumA  | 0  | 0  | 1 | 1,5     | 0 | 1  | 0 | 67,57 | 0 | 7,9   | 0 | 7,9  | 0 | 7,9   |
| BC103 | Basal | 0  | 5  | 2 | 3       | 1 | 0  | 0 | 46,83 | 0 | 13,27 | 0 | 10   | 0 | 13,27 |
| BC106 | LumA  | 0  | 0  | 1 | 2,4     | 0 | 1  | 0 | 51,81 | 0 | 5,36  | 0 | 5,36 | 0 | 5,36  |
| BC107 | LumB  | 0  | 0  | 3 | >2      | 0 | 1  | 0 | 53,8  | 1 | 9,19  | 1 | 9,19 | 0 | 12,41 |
| BC109 | LumA  | 0  | 0  | 1 | 3       | 1 | 1  | 0 | 67,77 | 1 | 6,48  | 1 | 6,48 | 1 | 7,92  |
| BC120 | LumA  | 0  | 0  | 1 | 3       | 1 | 1  | 0 | 57,7  | 0 | 9,99  | 0 | 9,99 | 0 | 9,99  |
| BC123 | LumA  | 0  | 0  | 1 | 1,3     | 0 | 1  | 0 | 66,14 | 1 | 3,75  | 1 | 3,75 | 1 | 5,18  |
| BC125 | LumA  | 0  | 0  | 1 | 2,3     | 0 | 1  | 0 | 67,41 | 0 | 6,11  | 0 | 6,11 | 0 | 6,11  |
| BC126 | LumA  | 0  | 20 | 1 | 3,2     | 1 | 1  | 0 | 71,68 | 1 | 0,01  | 1 | 0,01 | 0 | 6,1   |
| BC19  | LumB  | 0  | 0  | 3 | 2.6+0.6 | 1 | 1  | 0 | 59,1  | 1 | 4,28  | 1 | 4,28 | 0 | 9,32  |
| BC20  | LumA  | 0  | 0  | 1 | 2,7     | 1 | 1  | 0 | 68,03 | 0 | 6,07  | 0 | 6,07 | 0 | 6,07  |
| BC25  | LumB  | 5  | 10 | 3 | 1,8     | 0 | 1  | 0 | 49,04 | 0 | 8,03  | 0 | 8,03 | 0 | 8,03  |
| BC32  | LumB  | 5  | 10 | 3 | 2,7     | 0 | 1  | 0 | 51,61 | 0 | 4,48  | 0 | 4,48 | 0 | 4,48  |



|       |       |    |    |   |                    |   |   |   |       |   |       |   |      |   |       |
|-------|-------|----|----|---|--------------------|---|---|---|-------|---|-------|---|------|---|-------|
| BC55  | HER2  | 0  | 0  | 3 | 3                  | 0 | 0 | 1 | 34,14 | 1 | 3,37  | 1 | 3,37 | 1 | 4,98  |
| BC58  | Basal | 5  | 20 | 3 | 3,5                | 0 | 0 | 0 | 68,48 | 1 | 1,47  | 1 | 1,47 | 1 | 5,56  |
| BC60  | LumA  | 0  | 0  | 1 | 1,7                | 1 | 1 | 0 | 48,64 | 0 | 6,83  | 0 | 6,83 | 0 | 6,83  |
| BC61  | LumB  | 0  | 0  | 3 | 2,5                | 0 | 1 | 0 | 61,7  | 1 | 4,58  | 1 | 4,58 | 0 | 7,08  |
| BC65  | Basal | NA | NA | 3 | 1.2-1.3            | 0 | 0 | 0 | 54,01 | 0 | 6,22  | 0 | 6,22 | 0 | 6,22  |
| BC69  | LumB  | 0  | 10 | 3 | 5,5                | 1 | 1 | 0 | 78,29 | 1 | 0,08  | 1 | 0,08 | 1 | 2,97  |
| BC84  | Basal | 0  | 0  | 2 | 1,3                | 0 | 0 | 0 | 36,3  | 1 | 2,42  | 1 | 2,42 | 0 | 7,08  |
| BC96  | LumA  | 0  | 0  | 1 | 1,5                | 0 | 1 | 0 | 47,88 | 0 | 6,38  | 0 | 6,38 | 0 | 6,38  |
| BC97  | LumA  | 0  | 0  | 1 | 1,6                | 0 | 1 | 0 | 52,56 | 0 | 5,96  | 0 | 5,96 | 0 | 5,96  |
| BC99  | LumA  | 0  | 0  | 1 | 1,5                | 0 | 1 | 0 | 59,36 | 0 | 13,45 | 0 | 10   | 0 | 13,45 |
| BC105 | Basal | 0  | 10 | 3 | 1,3                | 1 | 0 | 0 | 41,54 | 0 | 8,74  | 0 | 8,74 | 0 | 8,74  |
| BC115 | Basal | 0  | 0  | 3 | 2,5                | 0 | 0 | 0 | 59,08 | 1 | 2,56  | 1 | 2,56 | 1 | 4,89  |
| BC119 | Basal | 0  | 0  | 3 | 3,5                | 0 | 0 | 0 | 62,62 | 1 | 4,25  | 1 | 4,25 | 1 | 4,69  |
| BC12  | LumB  | 0  | 5  | 3 | 3,8                | 1 | 1 | 0 | 46,58 | 0 | 8,82  | 0 | 8,82 | 0 | 8,82  |
| BC13  | LumB  | 5  | 40 | 3 | 1,3                | 0 | 1 | 0 | 63,54 | 0 | 9,03  | 0 | 9,03 | 0 | 9,03  |
| BC15  | LumB  | 5  | 10 | 3 | 1,7                | 0 | 1 | 0 | 45,07 | 0 | 8,98  | 0 | 8,98 | 0 | 8,98  |
| BC16  | LumB  | 5  | 90 | 3 | 1.7+0.7<br>BIFOCAL | 1 | 1 | 0 | 60,57 | 0 | 7,61  | 0 | 7,61 | 0 | 7,61  |
| BC23  | Basal | 0  | 0  | 3 | 1,2                | 0 | 0 | 0 | 74,24 | 1 | 2,56  | 1 | 2,56 | 1 | 4,07  |
| BC30  | LumB  | 0  | 10 | 3 | 2,1                | 1 | 1 | 0 | 51,36 | 0 | 5,72  | 0 | 5,72 | 0 | 5,72  |

|       |       |    |    |   |         |   |   |   |       |   |      |   |      |   |       |
|-------|-------|----|----|---|---------|---|---|---|-------|---|------|---|------|---|-------|
| BC31  | LumB  | 0  | 0  | 3 | 1,2     | 0 | 1 | 0 | 60,34 | 0 | 7,44 | 0 | 7,44 | 0 | 7,44  |
| BC38  | LumB  | NA | NA | 3 | 2,5     | 1 | 1 | 0 | 77,17 | 1 | 2,05 | 1 | 2,05 | 1 | 3,77  |
| BC4   | LumB  | 0  | 5  | 3 | 4,5     | 1 | 1 | 0 | 44,06 | 0 | 8,4  | 0 | 8,4  | 0 | 8,4   |
| BC40  | LumB  | 0  | 0  | 3 | 2,65    | 0 | 1 | 0 | 51,96 | 0 | 8,39 | 0 | 8,39 | 0 | 8,39  |
| BC43  | LumB  | 0  | 0  | 3 | 5,5     | 1 | 1 | 0 | 82,13 | 0 | 1,4  | 0 | 1,4  | 1 | 1,52  |
| BC48  | LumB  | 20 | 60 | 3 | 9,5     | 1 | 1 | 0 | 45,42 | 1 | 3,9  | 1 | 3,9  | 0 | 7,23  |
| BC70  | LumB  | 0  | 0  | 3 | 2,2     | 0 | 0 | 0 | 39,78 | 1 | 7,46 | 1 | 7,46 | 0 | 12,8  |
| BC71  | LumA  | 0  | 0  | 1 | 1,6     | 0 | 1 | 0 | 42,07 | 0 | 5,95 | 0 | 5,95 | 0 | 5,95  |
| BC72  | LumB  | 0  | 5  | 3 | 2,1     | 1 | 1 | 0 | 53,82 | 1 | 1,69 | 1 | 1,69 | 1 | 4,58  |
| BC74  | Basal | NA | NA | 3 | 2,3     | 1 | 0 | 0 | 79,86 | 1 | 4,43 | 1 | 4,43 | 0 | 4,52  |
| BC75  | HER2  | 0  | 0  | 3 | 5,5     | 1 | 1 | 1 | 48,34 | 0 | 6,12 | 0 | 6,12 | 0 | 6,12  |
| BC88  | LumB  | 0  | 0  | 3 | 3       | 1 | 1 | 0 | 64,86 | 1 | 5,92 | 1 | 5,92 | 0 | 7,93  |
| BC90  | Basal | 0  | 0  | 3 | 2,4     | 0 | 0 | 0 | 54,19 | 0 | 3,82 | 0 | 3,82 | 1 | 7,42  |
| BC104 | LumA  | 0  | 0  | 1 | 2,7     | 0 | 1 | 0 | 66,18 | 0 | 7,98 | 0 | 7,98 | 0 | 7,98  |
| BC110 | LumB  | NA | NA | 2 | 1.1+2.1 | 1 | 1 | 0 | 39,69 | 0 | 5,19 | 0 | 5,19 | 0 | 5,19  |
| BC117 | Basal | 0  | 0  | 3 | 3,2     | 1 | 0 | 0 | 41,86 | 1 | 1,89 | 1 | 1,89 | 1 | 3,26  |
| BC118 | HER2  | 0  | 0  | 3 | 2,8     | 1 | 0 | 1 | 66,04 | 1 | 1,17 | 1 | 1,17 | 1 | 2,77  |
| BC129 | LumB  | NA | NA | 3 | 1,9     | 0 | 1 | 0 | 58,49 | 1 | 5,06 | 1 | 5,06 | 0 | 11,44 |
| BC14  | Basal | NA | NA | 2 | 3,2     | 0 | 0 | 0 | 75,86 | 1 | 2,85 | 1 | 2,85 | 1 | 3,43  |
| BC17  | LumB  | 0  | 0  | 3 | 3,8     | 1 | 1 | 0 | 57,72 | 1 | 4,93 | 1 | 4,93 | 1 | 8,9   |

|      |       |    |    |   |     |   |   |   |       |   |      |   |      |   |      |
|------|-------|----|----|---|-----|---|---|---|-------|---|------|---|------|---|------|
| BC21 | LumB  | 0  | 0  | 3 | 3,4 | 1 | 1 | 0 | 52,76 | 1 | 8,19 | 1 | 8,19 | 0 | 9,3  |
| BC22 | LumA  | 0  | 0  | 1 | 1,3 | 1 | 1 | 0 | 69,83 | 0 | 9,68 | 0 | 9,68 | 0 | 9,68 |
| BC26 | LumA  | 0  | 5  | 1 | 3,2 | 0 | 1 | 0 | 40,59 | 0 | 7,63 | 0 | 7,63 | 0 | 7,63 |
| BC29 | LumA  | 0  | 0  | 1 | 1,8 | 1 | 1 | 0 | 57,08 | 0 | 8,01 | 0 | 8,01 | 0 | 8,01 |
| BC33 | LumB  | 0  | 0  | 3 | 3,2 | 1 | 1 | 0 | 51,87 | 1 | 0,13 | 1 | 0,13 | 0 | 7,64 |
| BC36 | LumB  | 0  | 0  | 3 | 3,5 | 1 | 1 | 0 | 41,92 | 0 | 1,44 | 0 | 1,44 | 1 | 1,5  |
| BC41 | Basal | 5  | 0  | 3 | 3   | 1 | 0 | 0 | 59,38 | 0 | 6,07 | 0 | 6,07 | 0 | 6,07 |
| BC44 | LumA  | 0  | 0  | 1 | 2,3 | 0 | 1 | 0 | 71,51 | 0 | 6,82 | 0 | 6,82 | 0 | 6,82 |
| BC46 | LumB  | 0  | 0  | 3 | 2,1 | 0 | 1 | 0 | 39,36 | 0 | 7,32 | 0 | 7,32 | 0 | 7,32 |
| BC47 | LumA  | NA | NA | 1 | 2,3 | 0 | 1 | 0 | 62,23 | 0 | 7,11 | 0 | 7,11 | 0 | 7,11 |
| BC5  | LumB  | 0  | 0  | 3 | 1,7 | 0 | 1 | 0 | 77,34 | 0 | 6,53 | 0 | 6,53 | 0 | 6,53 |
| BC52 | LumA  | 0  | 20 | 1 | 1,8 | 0 | 1 | 0 | 51,82 | 0 | 6,78 | 0 | 6,78 | 0 | 6,78 |
| BC59 | LumB  | 10 | 10 | 3 | 1,5 | 0 | 1 | 0 | 35,85 | 1 | 1,31 | 1 | 1,31 | 0 | 6,58 |
| BC63 | LumA  | 0  | 0  | 1 | 1   | 0 | 1 | 0 | 60,2  | 0 | 5,99 | 0 | 5,99 | 0 | 5,99 |
| BC64 | HER2  | 0  | 10 | 2 | 1,1 | 0 | 1 | 1 | 44,34 | 0 | 6,09 | 0 | 6,09 | 0 | 6,09 |
| BC77 | LumA  | NA | NA | 1 | 1,3 | 0 | 1 | 0 | 61,52 | 0 | 5,84 | 0 | 5,84 | 0 | 5,84 |
| BC8  | LumA  | 0  | 10 | 1 | 1,3 | 0 | 1 | 0 | 36,2  | 0 | 8,79 | 0 | 8,79 | 0 | 8,79 |
| BC81 | HER2  | 10 | 20 | 3 | 1,1 | 0 | 0 | 1 | 61    | 0 | 4,95 | 0 | 4,95 | 0 | 4,95 |
| BC83 | HER2  | NA | NA | 2 | 1,1 | 0 | 0 | 1 | 61,86 | 0 | 6,06 | 0 | 6,06 | 0 | 6,06 |
| BC87 | Basal | 0  | 10 | 3 | 1,4 | 0 | 0 | 0 | 58,03 | 1 | 0,67 | 1 | 0,67 | 1 | 1,58 |

|      |      |   |    |   |     |   |   |   |       |   |       |   |      |   |       |
|------|------|---|----|---|-----|---|---|---|-------|---|-------|---|------|---|-------|
| BC89 | LumA | 0 | 5  | 1 | 2   | 1 | 1 | 0 | 48,48 | 1 | 9,01  | 1 | 9,01 | 0 | 12,83 |
| BC9  | HER2 | 0 | 2  | 3 | 2,7 | 1 | 0 | 1 | 28,64 | 0 | 9,02  | 0 | 9,02 | 0 | 9,02  |
| BC91 | LumA | 0 | 10 | 1 | 1,8 | 1 | 1 | 0 | 49,26 | 1 | 10,16 | 0 | 10   | 0 | 13,33 |
| BC93 | LumB | 0 | 5  | 3 | 2,1 | 0 | 0 | 0 | 65,53 | 1 | 4,18  | 1 | 4,18 | 1 | 4,19  |

**eTable 3. Histopathologic TIL evaluation methods.**

| Cohort | Histopathologic sample                           | Method                                                                                                                                                                                                                                                                                                                                                                                                                                                                     | Reference                                                                                                                                  |
|--------|--------------------------------------------------|----------------------------------------------------------------------------------------------------------------------------------------------------------------------------------------------------------------------------------------------------------------------------------------------------------------------------------------------------------------------------------------------------------------------------------------------------------------------------|--------------------------------------------------------------------------------------------------------------------------------------------|
| PNC1   | Hematoxylin and eosin-stained full sections      | Lymphocytic infiltration (intra-tumoral) was defined as the percentage of mononuclear cells within the epithelium of the invasive tumor cell nests. Histopathologic evaluation of TILs was performed independently by two well-trained pathologists; the mean value was used for the analyses presented.                                                                                                                                                                   | Dedeurwaerder et al., <i>EMBO Mol Med</i> , 2011 <sup>1</sup> ; Denkert et al., <i>J Clin Oncol</i> , 2010 <sup>2</sup>                    |
|        | Immunohistochemistry (IHC)-stained full sections | Immunohistochemical staining of CD45 (Dako Denmark A/S, Glostrup, Denmark), CD3 (Dako Denmark A/S, Glostrup, Denmark) and CD20 (Dako Denmark A/S, Glostrup, Denmark) was performed according to standard procedures. TILs were scored as continuous variable on one full section per case and were reported as the percentage of tumor area infiltrated by lymphocytes. Histopathologic analysis of the TILs was performed independently by two well-trained pathologists. | Denkert et al., <i>J Clin Oncol</i> , 2010 <sup>2</sup>                                                                                    |
| PNC2   | Hematoxylin and eosin-stained full sections      | Lymphocytic infiltration (intra-tumoral) was defined as the percentage of mononuclear cells within the epithelium of the invasive tumor cell nests. Histopathologic evaluation of TILs was performed independently by two well-trained pathologists; the mean value was used for the analyses presented.                                                                                                                                                                   | Dedeurwaerder et al., <i>EMBO Mol Med</i> , 2011 <sup>1</sup> ; Denkert et al., <i>J Clin Oncol</i> , 2010 <sup>2</sup>                    |
| TCGA   | Hematoxylin and eosin-stained sections           | A minimum of ten specimen fields were assessed to evaluate the percent of nuclei and necrosis. Then the total percent of the different cell types was evaluated. (Necrotic cells were not part of this calculation)                                                                                                                                                                                                                                                        | <a href="http://www.nationwidechildrens.org/tss-training-webinar">http://www.nationwidechildrens.org/tss-training-webinar</a> <sup>3</sup> |
| TOP    | ---                                              | ---                                                                                                                                                                                                                                                                                                                                                                                                                                                                        | ---                                                                                                                                        |

NOTE: Methods for morphological TILs evaluation are described in detail in the following references: <sup>1</sup>Dedeurwaerder *et al.* (2011) DNA methylation profiling reveals a predominant immune component in breast cancers. *EMBO Mol Med*. 3(12), 726-41. <sup>2</sup>Denkert *et al.* (2010) Tumor-associated lymphocytes as an independent predictor of response to neoadjuvant chemotherapy in breast cancer. *J Clin Oncol*. 28(1), 105-13. <sup>3</sup><http://www.nationwidechildrens.org/tss-training-webinar>.

**eTable 4. Probe information for MeTIL signature markers.**

| Ilmn ID    | Corresponding gene | Full name                                                                                           | mRNA ID RefSeq             | Cytosine position hg19 | Surrounding sequence                                                                                                                              |
|------------|--------------------|-----------------------------------------------------------------------------------------------------|----------------------------|------------------------|---------------------------------------------------------------------------------------------------------------------------------------------------|
| cg20792833 | PTPRCAP            | Homo sapiens protein tyrosine phosphatase, receptor type, C-associated protein                      | NM_005608                  | chr11:67205195         | GCTGTGTCGAGCGAGAAGTGAGCT<br>CAGTGCTCGTCTGCAGTGAAGGGT<br>GGCCCCAGGCTTC[CG]CTTCCTGCC<br>ACATACCCACCTGCCCTCCCTGC<br>TGCAGGACCCCTGGTCCACACCAG<br>A    |
| cg20425130 | KLHL6              | Homo sapiens kelch-like family member 6                                                             | NM_130446                  | chr3:183273245         | TGGCAGGAGAATTCCTGAATGTCCA<br>CACACAAGATGACATCTGTCAGAGC<br>GTTTTCCATT[CG]CAGGGTTTCCAG<br>GCCATTCTGAAGAATTAAGGAGAGT<br>CCCGCGTCGTCAAATTTGACCTT      |
| cg23642747 | INA                | Homo sapiens internexin neuronal intermediate filament protein, alpha                               | NM_032727                  | chr10:105036645        | GGGATGCGACAGAGCTGTGTGGTT<br>TCCGGATGGGAAACCTCAGTCGTTT<br>AGGCACCCCTC[CG]CTCGAGTCACT<br>TCCGAAGCAGTCGATTCTTGGGGAG<br>AAGCGCTGCGGAAAGGGGCGACTC      |
| cg12069309 | SEMA3B             | Homo sapiens sema domain, immunoglobulin domain, secreted, (semaphorin) 3B domain (Ig), short basic | NM_001005914;<br>NM_004636 | chr3:50312913          | GGGGTTCGCGTGCACGCGCTTCCAG<br>CCCAGTGCCAAGAGGTGGGCGGGG<br>TCGGGGTTGGGC[CG]CCGGGAGGG<br>AGGCGAAGGGTCTTTCACTGCCCG<br>GGGCTGAAAGAAGGGCTCACAGAA<br>GAT |
| cg21554552 | RASSF1             | Homo sapiens Ras association (RalGDS/AF-6) domain family member 1                                   | NM_007182;<br>NM_170714    | chr3:50378425          | AGAGCCGCGCAATGGAAACCTGGG<br>TGCAGGGACTGTGGGGCCCCAAGG<br>CGGGGCTGGGCG[CG]CTCTCGCAG<br>AGCCCCCCCCGCTTGCCCTTCCTT<br>CCCTCCTTCGTCCCCTCCTCACACC<br>C   |

**eTable 5. Clinical data for cohort 2.**

| Sample Name | Age diagnosis | tumor size cm | nodes pos | grade | er status | pgr status | HER2 status | e ddfs | t ddfs | e os | t os | iTU.Ly | str.Ly | Subtype IHC |
|-------------|---------------|---------------|-----------|-------|-----------|------------|-------------|--------|--------|------|------|--------|--------|-------------|
| 2-1         | 74.22         | 1.3           | 0         | 1     | 1         | 1          | 0           | 0      | 3.44   | 0    | 3.44 | 1      | 0      | LumA        |
| 2-10        | 47.36         | 1.3           | 0         | 1     | 1         | 1          | 0           | 0      | 4.82   | 0    | 4.82 | 5      | 0      | LumA        |
| 2-100       | 47.72         | 1.8           | 0         | 3     | 0         | 0          | 0           | 0      | 6.03   | 0    | 6.03 | 30     | 5      | NA          |
| 2-101       | 68.97         | 4.0           | 0         | 3     | 0         | 0          | 0           | 0      | 0.96   | 0    | 0.96 | 15     | 2      | Basal       |
| 2-102       | 72.99         | 0.4           | 0         | 3     | 0         | 0          | 0           | 0      | 4.89   | 0    | 4.89 | 5      | 0      | Basal       |
| 2-103       | 56.54         | 5.5           | 1         | 3     | 0         | 0          | 0           | 0      | 5.14   | 0    | 5.14 | 20     | 5      | Basal       |
| 2-104       | 65.38         | 3.0           | 0         | 3     | 0         | 0          | 0           | 0      | 4.65   | 0    | 4.65 | 40     | 60     | Basal       |
| 2-105       | 55.48         | 1.4           | 0         | 3     | 0         | 0          | 0           | 1      | 1.09   | 0    | 4.75 | 10     | 1      | Basal       |
| 2-106       | 60.21         | 0.8           | 0         | 3     | 0         | 0          | 0           | 0      | 3.81   | 0    | 3.81 | 45     | 5      | Basal       |
| 2-107       | 36.96         | 1.6           | 0         | 3     | 0         | 0          | 0           | 0      | 4.44   | 0    | 4.44 | 5      | 0      | Basal       |
| 2-108       | 72.29         | 2.9           | 0         | 3     | 0         | 0          | 0           | 1      | 0.82   | 1    | 1.01 | 60     | 5      | Basal       |
| 2-109       | 46.73         | 2.2           | 3         | 3     | 0         | 0          | 0           | 0      | 1.96   | 0    | 1.96 | 25     | 1      | Basal       |
| 2-11        | 49.95         | 0.9           | 0         | 1     | 1         | 1          | 0           | 0      | 5.06   | 0    | 5.06 | 5      | 0      | LumA        |
| 2-110       | 41.40         | 1.5           | 2         | 3     | 1         | 1          | 0           | 0      | 4.32   | 0    | 4.32 | 5      | 0      | LumB        |
| 2-111       | 65.58         | 1.8           | 2         | 3     | 0         | 0          | 0           | 0      | 3.42   | 0    | 3.42 | 15     | 0      | Basal       |
| 2-112       | 35.15         | 1.8           | 1         | 3     | 0         | 0          | 0           | 1      | 1.90   | 1    | 3.01 | 10     | 2      | Basal       |

|       |       |     |    |   |   |   |   |   |      |   |      |    |    |       |
|-------|-------|-----|----|---|---|---|---|---|------|---|------|----|----|-------|
| 2-113 | 60.16 | 1.7 | 1  | 3 | 0 | 0 | 0 | 0 | 4.99 | 0 | 4.99 | 5  | 0  | Basal |
| 2-114 | 60.96 | 1.1 | 0  | 3 | 0 | 0 | 0 | 0 | 3.06 | 0 | 3.06 | 30 | 1  | Basal |
| 2-115 | 55.99 | 2.2 | 0  | 3 | 0 | 0 | 0 | 0 | 3.61 | 0 | 3.61 | 60 | 15 | Basal |
| 2-116 | 23.38 | 1.4 | 0  | 3 | 0 | 1 | 0 | 0 | 3.18 | 0 | 3.18 | 20 | 1  | Basal |
| 2-117 | 38.92 | 4.2 | 0  | 3 | 0 | 0 | 0 | 0 | 3.53 | 0 | 3.53 | NA | NA | Basal |
| 2-118 | 48.90 | 2.2 | 37 | 3 | 0 | 0 | 0 | 0 | 2.07 | 0 | 2.07 | 40 | 5  | Basal |
| 2-119 | 50.99 | 1.9 | 0  | 3 | 0 | 0 | 0 | 0 | 2.06 | 0 | 2.06 | NA | NA | Basal |
| 2-12  | 72.08 | 1.1 | 0  | 1 | 1 | 1 | 0 | 0 | 7.06 | 0 | 7.06 | 5  | 1  | LumA  |
| 2-120 | 41.24 | 2.1 | 0  | 3 | 0 | 0 | 0 | 0 | 2.18 | 0 | 2.18 | 30 | 5  | Basal |
| 2-13  | 91.43 | 1.6 | NA | 1 | 1 | 1 | 0 | 0 | 1.34 | 1 | 1.34 | 10 | 2  | LumA  |
| 2-14  | 76.10 | 1.1 | 0  | 1 | 1 | 1 | 0 | 0 | 7.88 | 0 | 7.88 | 5  | 2  | LumA  |
| 2-15  | 47.80 | 0.7 | 0  | 1 | 1 | 1 | 0 | 0 | 0.03 | 0 | 0.03 | 25 | 10 | LumA  |
| 2-16  | 62.25 | 1.1 | 0  | 1 | 1 | 0 | 0 | 1 | 4.17 | 0 | 7.76 | 1  | 0  | LumA  |
| 2-17  | 67.06 | 9.0 | 0  | 1 | 1 | 0 | 0 | 0 | 3.40 | 0 | 3.40 | 5  | 0  | LumA  |
| 2-18  | 50.92 | 1.4 | 0  | 1 | 1 | 1 | 0 | 0 | 5.73 | 0 | 5.73 | NA | 1  | LumA  |
| 2-19  | 83.44 | 2.3 | NK | 1 | 1 | 0 | 0 | 0 | 5.39 | 0 | 5.39 | NA | NA | LumA  |
| 2-2   | 42.22 | 1.4 | 0  | 1 | 1 | 1 | 0 | 0 | 4.13 | 0 | 4.13 | NA | NA | LumA  |
| 2-20  | 84.33 | 1.7 | 0  | 1 | 1 | 1 | 0 | 0 | 3.17 | 0 | 3.17 | 5  | 0  | LumA  |
| 2-21  | 43.68 | 1.9 | 1  | 1 | 1 | 1 | 0 | 0 | 6.41 | 0 | 6.41 | 5  | 0  | LumA  |
| 2-22  | 64.61 | 1.0 | 0  | 1 | 1 | 1 | 0 | 0 | 6.98 | 0 | 6.98 | 1  | 0  | LumA  |



|      |       |     |    |   |   |   |   |   |       |   |       |    |    |      |
|------|-------|-----|----|---|---|---|---|---|-------|---|-------|----|----|------|
| 2-23 | 62.32 | 1.9 | 0  | 1 | 1 | 1 | 0 | 0 | 7.20  | 0 | 7.20  | 5  | 0  | LumA |
| 2-24 | 58.56 | 1.5 | 0  | 1 | 1 | 1 | 0 | 0 | 6.55  | 0 | 6.55  | 5  | 0  | NA   |
| 2-25 | 47.25 | 1.6 | 0  | 1 | 1 | 1 | 0 | 0 | 7.33  | 0 | 7.33  | 5  | 0  | LumA |
| 2-26 | 56.18 | 1.3 | 0  | 1 | 1 | 1 | 0 | 0 | 4.85  | 0 | 4.85  | 5  | 0  | LumA |
| 2-27 | 48.68 | 1.8 | 0  | 1 | 1 | 1 | 0 | 0 | 2.40  | 0 | 2.40  | 1  | 0  | LumA |
| 2-28 | 58.54 | 1.7 | 0  | 1 | 1 | 1 | 0 | 0 | 2.48  | 0 | 2.48  | 20 | 5  | LumA |
| 2-29 | 31.95 | 2.0 | 1  | 3 | 1 | 0 | 0 | 0 | 12.73 | 0 | 12.73 | NA | NA | LumB |
| 2-3  | 61.28 | 1.4 | 0  | 1 | 1 | 1 | 0 | 0 | 4.40  | 0 | 4.40  | NA | NA | LumA |
| 2-30 | 47.50 | 3.0 | NA | 3 | 1 | 0 | 0 | 1 | 10.59 | 0 | 13.48 | 5  | 0  | LumB |
| 2-31 | 30.19 | 2.0 | 0  | 3 | 1 | 1 | 0 | 0 | 2.96  | 0 | 2.96  | NA | NA | LumB |
| 2-32 | 49.26 | 1.9 | 0  | 3 | 1 | 1 | 0 | 0 | 1.28  | 0 | 1.28  | 15 | 2  | LumB |
| 2-33 | 80.58 | 0.8 | 0  | 3 | 1 | 1 | 0 | 0 | 2.10  | 0 | 2.10  | 1  | 0  | LumB |
| 2-34 | 56.70 | 2.3 | 0  | 3 | 1 | 0 | 0 | 0 | 3.61  | 0 | 3.61  | NA | NA | LumB |
| 2-35 | 61.53 | 2.0 | 0  | 3 | 1 | 1 | 0 | 0 | 3.32  | 0 | 3.32  | NA | NA | LumB |
| 2-36 | 70.62 | 1.9 | 3  | 3 | 1 | 1 | 0 | 0 | 3.06  | 0 | 3.06  | 10 | 0  | LumB |
| 2-37 | 75.32 | 4.0 | 0  | 3 | 1 | 0 | 0 | 1 | 0.47  | 0 | 0.62  | NA | NA | LumB |
| 2-38 | 56.33 | 2.7 | 14 | 3 | 1 | 0 | 0 | 1 | 0.38  | 1 | 1.40  | 5  | 0  | LumB |
| 2-39 | 72.34 | 1.7 | 0  | 3 | 1 | 0 | 0 | 0 | 0.36  | 0 | 0.36  | 10 | 2  | LumB |
| 2-4  | 50.59 | 1.8 | 0  | 1 | 1 | 1 | 0 | 0 | 4.42  | 0 | 4.42  | 1  | 0  | LumA |
| 2-40 | 47.30 | 1.7 | 9  | 3 | 1 | 1 | 0 | 0 | 5.83  | 0 | 5.83  | 5  | 0  | LumB |

|      |       |      |    |    |   |   |   |   |      |   |      |    |    |      |
|------|-------|------|----|----|---|---|---|---|------|---|------|----|----|------|
| 2-41 | 58.44 | 1.8  | 6  | 3  | 1 | 1 | 0 | 0 | 5.74 | 0 | 5.74 | 15 | 2  | LumB |
| 2-42 | 31.25 | 2.0  | 0  | 3  | 1 | 1 | 0 | 0 | 5.63 | 0 | 5.63 | 10 | 1  | LumB |
| 2-43 | 64.83 | 21.0 | 1  | 3  | 1 | 0 | 0 | 0 | 5.87 | 0 | 5.87 | 35 | 5  | LumB |
| 2-44 | 74.93 | 1.6  | 0  | 3  | 1 | 1 | 0 | 0 | 5.08 | 0 | 5.08 | 10 | 1  | LumB |
| 2-45 | 64.96 | 1.6  | 0  | 3  | 1 | 0 | 0 | 0 | 4.20 | 0 | 4.20 | 15 | 2  | LumB |
| 2-46 | 58.18 | 2.5  | 0  | 3  | 1 | 1 | 0 | 0 | 5.33 | 0 | 5.33 | 1  | 0  | LumB |
| 2-47 | 59.75 | 1.3  | 0  | 3  | 1 | 0 | 0 | 0 | 4.93 | 0 | 4.93 | 2  | 0  | LumB |
| 2-48 | 61.90 | 1.5  | 2  | 3  | 1 | 0 | 0 | 0 | 5.16 | 0 | 5.16 | 30 | 5  | LumB |
| 2-49 | 71.43 | 3.8  | 6  | 3  | 1 | 1 | 0 | 0 | 5.50 | 0 | 5.50 | 15 | 2  | LumB |
| 2-5  | 49.51 | 1.3  | 2  | 1  | 1 | 1 | 0 | 0 | 5.01 | 0 | 5.01 | 1  | 0  | LumA |
| 2-50 | 82.52 | 2.3  | 1  | 3  | 1 | 1 | 0 | 0 | 4.22 | 0 | 4.22 | 5  | 0  | LumB |
| 2-51 | 44.47 | NA   |    | NA | 1 | 1 | 0 | 0 | 1.04 | 0 | 1.04 | 5  | 0  | LumB |
| 2-52 | 35.81 | 3.0  | 1  | 3  | 1 | 1 | 0 | 0 | 2.82 | 0 | 2.82 | NA | NA | LumB |
| 2-53 | 67.95 | 2.1  | 11 | 3  | 1 | 1 | 0 | 0 | 1.13 | 0 | 1.13 | 5  | 0  | LumB |
| 2-54 | 76.12 | 1.9  | 0  | 3  | 1 | 1 | 0 | 0 | 7.24 | 0 | 7.24 | 35 | 5  | LumB |
| 2-55 | 51.38 | 1.5  | 1  | 3  | 1 | 1 | 0 | 0 | 6.64 | 0 | 6.64 | 5  | 0  | LumB |
| 2-56 | 48.23 | 1.5  | 0  | 3  | 1 | 1 | 0 | 0 | 7.55 | 0 | 7.55 | 15 | 5  | LumB |
| 2-57 | 74.48 | 2.9  | 0  | 3  | 1 | 0 | 0 | 1 | 3.38 | 1 | 7.39 | 5  | 0  | LumB |
| 2-58 | 70.49 | 1.6  | 1  | 3  | 1 | 1 | 0 | 0 | 8.05 | 0 | 8.05 | 2  | 0  | LumB |
| 2-59 | 73.53 | 3.5  | 1  | 3  | 0 | 0 | 1 | 0 | 4.48 | 0 | 4.48 | 5  | 0  | HER2 |

|      |       |      |    |   |   |   |   |   |       |   |       |    |    |      |
|------|-------|------|----|---|---|---|---|---|-------|---|-------|----|----|------|
| 2-6  | 51.97 | 1.6  | 1  | 1 | 1 | 1 | 0 | 0 | 5.62  | 0 | 5.62  | 30 | 1  | LumA |
| 2-60 | 58.77 | 1.8  | 0  | 3 | 0 | 0 | 1 | 0 | 4.09  | 0 | 4.09  | 20 | 5  | HER2 |
| 2-61 | 31.44 | 2.1  | 7  | 3 | 0 | 0 | 1 | 0 | 4.58  | 0 | 4.58  | 40 | 5  | HER2 |
| 2-62 | 76.64 | 3.3  | 2  | 3 | 0 | 0 | 1 | 0 | 4.62  | 0 | 4.62  | 20 | 2  | HER2 |
| 2-63 | 60.48 | 2.1  | 1  | 3 | 0 | 0 | 1 | 0 | 4.16  | 0 | 4.16  | 60 | 2  | HER2 |
| 2-64 | 40.94 | 6.0  | 0  | 3 | 0 | 0 | 1 | 0 | 4.69  | 0 | 4.69  | 2  | 0  | HER2 |
| 2-65 | 46.85 | 3.0  | 10 | 2 | 0 | 0 | 1 | 1 | 3.35  | 1 | 4.12  | 15 | 2  | HER2 |
| 2-66 | 57.32 | 5.5  | 3  | 3 | 0 | 0 | 1 | 0 | 5.20  | 0 | 5.20  | 50 | 5  | HER2 |
| 2-67 | 66.50 | 2.2  | 2  | 3 | 1 | 1 | 1 | 0 | 3.68  | 0 | 3.68  | NA | NA | HER2 |
| 2-68 | 40.67 | 4.0  | 2  | 3 | 0 | 1 | 1 | 0 | 2.99  | 0 | 2.99  | 20 | 2  | HER2 |
| 2-69 | 39.36 | 1.7  | 6  | 3 | 1 | 1 | 1 | 0 | 2.18  | 0 | 2.18  | 50 | 5  | HER2 |
| 2-7  | 47.78 | 1.1  | 0  | 1 | 1 | 1 | 0 | 0 | 4.78  | 0 | 4.78  | 1  | 0  | LumA |
| 2-70 | 60.75 | 1.4  | 0  | 3 | 1 | 1 | 1 | 0 | 0.51  | 0 | 0.51  | 5  | 5  | HER2 |
| 2-71 | 62.77 | 3.5  | 1  | 3 | 1 | 0 | 1 | 0 | 5.27  | 0 | 5.27  | 35 | 5  | HER2 |
| 2-72 | 48.72 | 1.7  | 1  | 3 | 1 | 1 | 1 | 0 | 2.84  | 0 | 2.84  | 5  | 0  | HER2 |
| 2-73 | 35.05 | 11.0 | 16 | 3 | 0 | 0 | 1 | 1 | 2.59  | 1 | 4.38  | 2  | 0  | HER2 |
| 2-74 | 77.95 | 1.2  | 0  | 3 | 1 | 0 | 1 | 0 | 5.00  | 0 | 5.00  | 10 | 0  | HER2 |
| 2-75 | 62.16 | 1.1  | 3  | 3 | 1 | 1 | 1 | 0 | 3.47  | 0 | 3.47  | 15 | 0  | HER2 |
| 2-76 | 59.42 | 1.3  | 0  | 2 | 0 | 0 | 1 | 0 | 3.40  | 0 | 3.40  | 5  | 0  | HER2 |
| 2-77 | 55.42 | 2.0  | 0  | 2 | 0 | 0 | 1 | 1 | 21.18 | 1 | 27.33 | 2  | 0  | HER2 |

|      |       |      |    |   |   |    |   |   |       |   |       |     |    |       |
|------|-------|------|----|---|---|----|---|---|-------|---|-------|-----|----|-------|
| 2-79 | 71.38 | 4.0  | 0  | 3 | 0 | 0  | 1 | 0 | 3.80  | 0 | 3.80  | 10  | 15 | HER2  |
| 2-8  | 42.04 | 1.4  | 0  | 1 | 1 | 1  | 0 | 0 | 5.12  | 0 | 5.12  | NA  | NA | LumA  |
| 2-80 | 48.91 | 1.9  | 0  | 3 | 0 | 0  | 1 | 0 | 4.12  | 0 | 4.12  | 30  | 2  | HER2  |
| 2-81 | 60.19 | 1.7  | 2  | 2 | 1 | 0  | 1 | 1 | 1.95  | 0 | 3.31  | NA  | NA | HER2  |
| 2-82 | 79.85 | 1.5  | 1  | 3 | 1 | 1  | 1 | 0 | 0.94  | 0 | 0.94  | 5   | 0  | HER2  |
| 2-83 | 37.99 | 14.0 | 5  | 3 | 1 | 0* | 1 | 1 | 13.62 | 0 | 20.25 | NA  | NA | HER2  |
| 2-84 | 82.83 | 3.4  | 1  | 3 | 1 | 1  | 1 | 0 | 3.71  | 0 | 3.71  | NA  | NA | HER2  |
| 2-85 | 59.77 | 1.6  | 0  | 3 | 0 | 0  | 0 | 0 | 7.31  | 0 | 7.31  | 40  | 5  | Basal |
| 2-86 | 78.39 | 4.3  | 0  | 3 | 0 | 0  | 0 | 0 | 3.75  | 0 | 3.75  | 70  | 5  | Basal |
| 2-87 | 57.60 | 1.6  | 1  | 3 | 0 | 0  | 0 | 0 | 7.20  | 0 | 7.20  | 100 | 5  | Basal |
| 2-88 | 35.27 | 2.8  | 0  | 3 | 0 | 0  | 0 | 0 | 5.00  | 0 | 5.00  | 15  | 0  | Basal |
| 2-89 | 53.92 | 1.8  | 0  | 3 | 0 | 0  | 0 | 0 | 5.70  | 0 | 5.70  | 10  | 0  | Basal |
| 2-9  | 68.30 | 1.3  | 0  | 1 | 1 | 1  | 0 | 0 | 0.95  | 0 | 0.95  | 5   | 0  | LumA  |
| 2-90 | 66.91 | 3.0  | 0  | 3 | 0 | 0  | 0 | 0 | 3.07  | 0 | 3.07  | 20  | 30 | Basal |
| 2-91 | 33.14 | 3.0  | 9  | 3 | 0 | 0  | 0 | 0 | 2.34  | 1 | 2.34  | 10  | 0  | Basal |
| 2-92 | 67.61 | 3.0  | 4  | 3 | 0 | 0  | 0 | 0 | 2.38  | 1 | 2.38  | 15  | 0  | Basal |
| 2-93 | 63.80 | 1.9  | 1  | 3 | 0 | 0  | 0 | 0 | 7.65  | 0 | 7.65  | 35  | 2  | Basal |
| 2-94 | 80.70 | 0.9  | 0  | 3 | 0 | 0  | 0 | 0 | 2.42  | 0 | 2.42  | 20  | 50 | Basal |
| 2-95 | 41.93 | 1.8  | 1  | 3 | 0 | 0  | 0 | 0 | 7.22  | 0 | 7.22  | 10  | 0  | Basal |
| 2-96 | 82.12 | 5.5  | 12 | 3 | 0 | 0  | 0 | 1 | 1.94  | 1 | 3.50  | 1   | 0  | Basal |

|      |       |     |   |   |   |   |   |   |      |   |      |    |    |       |
|------|-------|-----|---|---|---|---|---|---|------|---|------|----|----|-------|
| 2-97 | 39.32 | 1.6 | 0 | 3 | 0 | 0 | 0 | 1 | 1.44 | 0 | 1.70 | 35 | 15 | Basal |
| 2-98 | 50.56 | 1.1 | 0 | 3 | 0 | 0 | 0 | 0 | 0.02 | 0 | 0.02 | 25 | 10 | Basal |
| 2-99 | 56.84 | 0.7 | 3 | 2 | 0 | 0 | 0 | 1 | 0.73 | 1 | 1.25 | 30 | 5  | Basal |

**eTable 6. Clinical data for TOP trial.**

| Sample Name | pCR | Age Bin | T  | N  | Grade | HER2FISHbin | ESR1bimod | ERBB2bimod | DMFS event | DMFS time | OS event | OS time |
|-------------|-----|---------|----|----|-------|-------------|-----------|------------|------------|-----------|----------|---------|
| 1109        | 0   | 1       | T2 | N1 | 3     | 0           | 0         | 0          | 0          | 693       | 0        | 693     |
| 123         | 0   | 1       | T1 | N0 | 3     | 1           | 0         | 0          | NA         | NA        | NA       | NA      |
| 1312        | 0   | 0       | T1 | N0 | 3     | 1           | 0         | 1          | 0          | 860       | 0        | 860     |
| 1366        | 0   | 0       | T2 | N0 | 3     | 0           | 0         | 0          | 0          | 1404      | 0        | 1404    |
| 1391        | 0   | 1       | T2 | N0 | 3     | 1           | 0         | 1          | 0          | 1082      | 0        | 1082    |
| 1536        | 1   | 0       | T2 | N0 | 3     | 1           | 0         | 1          | 0          | 620       | 0        | 620     |
| 1674        | 0   | 0       | T2 | N1 | 3     | NA          | 0         | 0          | 0          | 1852      | 0        | 1852    |
| 1767        | 1   | 0       | T2 | N0 | 2     | 1           | 0         | 0          | 0          | 2011      | 0        | 2011    |
| 2090        | 0   | 0       | T4 | N1 | 3     | 0           | 0         | 0          | 1          | NA        | 1        | NA      |
| 2165        | 0   | 0       | T2 | N1 | 3     | 1           | 0         | 1          | 0          | 991       | 0        | 991     |
| 220         | 0   | 1       | T2 | N1 | 3     | 0           | 0         | 0          | 0          | 1358      | 0        | 1358    |
| 2325        | 0   | 1       | T4 | N1 | 3     | 1           | 0         | 0          | 0          | 675       | 0        | 675     |
| 2337        | 0   | 1       | T2 | N1 | 3     | 0           | 0         | 0          | 0          | 710       | 0        | 710     |
| 2744        | 0   | 0       | T1 | N3 | 3     | NA          | 0         | 1          | 0          | 2069      | 0        | 2069    |
| 3276        | 0   | 1       | T1 | N0 | 3     | 0           | 0         | 0          | 0          | 1041      | 0        | 1041    |
| 3414        | 0   | 1       | T2 | N1 | 3     | 1           | 0         | 1          | 1          | 254       | 0        | 2187    |
| 3731        | 0   | 0       | T2 | N0 | 3     | 1           | 0         | 1          | 0          | 845       | 0        | 845     |

|      |   |   |    |    |   |    |   |    |    |      |    |      |
|------|---|---|----|----|---|----|---|----|----|------|----|------|
| 4082 | 0 | 1 | T4 | N1 | 3 | 0  | 0 | 0  | 1  | 314  | 1  | 314  |
| 4270 | 0 | 1 | T2 | N1 | 3 | NA | 0 | 0  | 1  | 63   | 1  | 359  |
| 4291 | 0 | 1 | T2 | N0 | 3 | 0  | 0 | 0  | 1  | 1414 | 1  | 1932 |
| 4511 | 0 | 1 | T3 | N0 | 3 | 0  | 0 | 0  | 0  | 1839 | 0  | 1839 |
| 4864 | 0 | 1 | T1 | N0 | 3 | 0  | 0 | 0  | 1  | 627  | 0  | 1211 |
| 4917 | 0 | 1 | T2 | N1 | 3 | 0  | 0 | 0  | 0  | 771  | 0  | 771  |
| 4938 | 0 | 1 | T2 | N0 | 3 | NA | 0 | 0  | 0  | 449  | 0  | 449  |
| 4984 | 0 | 0 | T2 | N3 | 3 | 1  | 0 | 1  | 0  | 1856 | 0  | 1856 |
| 5180 | 0 | 1 | T2 | N0 | 3 | 0  | 0 | 0  | 1  | 223  | 1  | 431  |
| 5328 | 1 | 1 | T2 | N0 | 3 | 0  | 0 | 0  | 0  | 1132 | 0  | 1132 |
| 5437 | 0 | 0 | T1 | N0 | 3 | 0  | 0 | 0  | 0  | 669  | 0  | 669  |
| 5622 | 0 | 0 | T2 | N1 | 3 | 1  | 0 | 1  | 0  | 794  | 0  | 794  |
| 5706 | 0 | 1 | T2 | N0 | 2 | 1  | 0 | 0  | 1  | 1072 | 0  | 1524 |
| 5751 | 0 | 0 | T2 | N1 | 3 | NA | 0 | 1  | 0  | 919  | 0  | 919  |
| 5783 | 1 | 1 | T2 | N0 | 3 | 0  | 1 | NA | NA | NA   | NA | NA   |
| 5920 | 0 | 1 | T2 | N2 | 3 | 0  | 0 | 0  | 0  | NA   | 0  | NA   |
| 6181 | 0 | 0 | T2 | N1 | 3 | 0  | 0 | 0  | 0  | 777  | 0  | 777  |
| 6198 | 0 | 1 | T2 | N1 | 2 | 0  | 0 | 0  | 0  | 1259 | 0  | 1259 |
| 6276 | 0 | 0 | T2 | N0 | 3 | 0  | 0 | 0  | 0  | 748  | 0  | 748  |
| 6754 | 0 | 1 | T2 | N0 | 2 | 0  | 0 | 0  | 0  | 1376 | 0  | 1376 |

|      |   |    |    |    |    |    |    |    |    |      |    |      |
|------|---|----|----|----|----|----|----|----|----|------|----|------|
| 6767 | 0 | 0  | T4 | N1 | 3  | 0  | 0  | 0  | 1  | 464  | 1  | 464  |
| 682  | 0 | 1  | T4 | N2 | 2  | 0  | 0  | 0  | 1  | 732  | 1  | 732  |
| 6839 | 0 | 1  | T1 | N1 | 3  | 0  | 0  | 0  | 0  | 1390 | 0  | 1390 |
| 6951 | 0 | 1  | T4 | N1 | 2  | 0  | 0  | 0  | 0  | 725  | 0  | 725  |
| 7173 | 1 | 1  | T2 | N2 | 3  | 1  | 0  | 1  | 0  | 1130 | 0  | 1130 |
| 7182 | 0 | NA   | NA | NA   |
| 7469 | 0 | 0  | T3 | N1 | 3  | 0  | 0  | 0  | 1  | 291  | 1  | 858  |
| 7500 | 0 | 0  | T3 | N1 | 3  | NA | 0  | 0  | 1  | 558  | 0  | 726  |
| 7634 | 1 | 0  | T2 | N1 | 3  | 0  | 0  | 0  | 0  | 1208 | 0  | 1208 |
| 8319 | 0 | 0  | T4 | N1 | 2  | 0  | 0  | 0  | 0  | 1772 | 0  | 1772 |
| 845  | 0 | 1  | T2 | N0 | 3  | 1  | 0  | 0  | 0  | 1647 | 0  | 1647 |
| 8660 | 0 | 0  | T2 | N0 | 3  | 0  | 0  | 0  | 0  | NA   | 0  | NA   |
| 8739 | 0 | 1  | T2 | N1 | 3  | 0  | 0  | 0  | NA | NA   | NA | NA   |
| 8999 | 0 | 0  | T2 | N0 | 3  | NA | 0  | 0  | 1  | 249  | 1  | 547  |
| 9049 | 0 | 0  | T2 | N1 | 1  | 0  | 0  | 0  | 0  | 599  | 0  | 599  |
| 9064 | 0 | 0  | T2 | N1 | 3  | 0  | 0  | 0  | 0  | 1408 | 0  | 1408 |
| 9171 | 0 | 0  | T2 | N1 | 3  | 1  | 0  | 1  | 0  | 1719 | 0  | 1719 |
| 9386 | 0 | 0  | T2 | N0 | 2  | 0  | 0  | 0  | 0  | 956  | 0  | 956  |
| 9434 | 0 | 1  | T4 | N1 | 3  | NA | 0  | 0  | 1  | 160  | 0  | 737  |
| 9576 | 1 | 0  | T4 | N1 | 3  | 0  | 0  | 0  | 0  | 1748 | 0  | 1748 |



|      |   |   |    |    |   |   |   |   |   |      |   |      |
|------|---|---|----|----|---|---|---|---|---|------|---|------|
| 9665 | 0 | 0 | T2 | N0 | 3 | 1 | 0 | 1 | 0 | 1008 | 0 | 1008 |
|------|---|---|----|----|---|---|---|---|---|------|---|------|

**eTable 7. Baseline characteristics of breast cancer patient cohorts.**

| Characteristic   |          | Cohort 1 (n = 118) | Cohort 2 (n = 119) | TOP (n = 58) |
|------------------|----------|--------------------|--------------------|--------------|
| Age, mean        |          | 56                 | 58                 | 50           |
| Age              | ≤ mean   | 64                 | 57                 | 28           |
|                  | > mean   | 54                 | 62                 | 29           |
|                  | Missing  | /                  | /                  | 1            |
| Tumor size       |          |                    |                    |              |
|                  | T1-T2    | /                  | /                  | 45           |
|                  | T3-T4    | /                  | /                  | 12           |
|                  | Missing  | 118                | 119                | 1            |
|                  | ≤ 2      | 44                 | 76                 | /            |
|                  | > 2      | 74                 | 42                 | /            |
|                  | Missing  | /                  | 1                  | 58           |
| Histologic grade |          |                    |                    |              |
|                  | G1-G2    | 34                 | 33                 | 9            |
|                  | G3       | 84                 | 85                 | 48           |
|                  | Missing  | /                  | 1                  | 1            |
| Nodal status     |          |                    |                    |              |
|                  | N0       | 64                 | 69                 | 24           |
|                  | N1-N3    | 54                 | 48                 | 33           |
|                  | Missing  | /                  | 2                  | 1            |
| Ki67, %          |          |                    |                    |              |
|                  | ≤ 25     | /                  | 63                 | /            |
|                  | > 25     | /                  | 55                 | /            |
|                  | Missing  | 118                | 1                  | 58           |
| ER status by IHC |          |                    |                    |              |
|                  | Positive | 64                 | 70                 | 1            |

|                    |    |    |    |
|--------------------|----|----|----|
| Negative           | 53 | 49 | 56 |
| Missing            | 1  | /  | 1  |
| HER2 status by IHC |    |    |    |
| Positive           | 30 | 25 | 13 |
| Negative           | 88 | 94 | 43 |
| Missing            | /  | /  | 2  |

Abbreviations: HER2, human epidermal growth factor receptor 2 positive subtype; ER, estrogen receptor; PR, progesterone receptor; IHC, immunohistochemistry.

**eTable 8. Correlation between the MeTIL score or PaTIL and median survival of breast cancer patients by breast cancer subtype in various cohorts (univariate COX proportional hazards regression).**

| Subtype | Cohort   | Patients(Events) | MeTIL Score |                    |              | PaTIL |             |       |
|---------|----------|------------------|-------------|--------------------|--------------|-------|-------------|-------|
|         |          |                  | HR          | 95 % CI            | P            | HR    | 95% CI      | P     |
| TN      | Cohort 1 | 28(14)           | 1.05        | 0.78 – 1.41        | 0.757        | 1.01  | 0.99 – 1.04 | 0.213 |
|         | Cohort 2 | 32(6)            | <b>0.42</b> | <b>0.20 – 0.91</b> | <b>0.027</b> | 0.92  | 0.75 – 1.14 | 0.463 |
|         | TOP      | 38(8)            | <b>0.59</b> | <b>0.39 – 0.89</b> | <b>0.012</b> | /     | /           | /     |
| LUM     | Cohort 1 | 52(18)           | <b>0.65</b> | <b>0.43 – 0.98</b> | <b>0.041</b> | 1     | 0.93 – 1.06 | 0.894 |
|         | Cohort 2 | 47(3)            | <b>0.25</b> | <b>0.06 – 0.96</b> | <b>0.043</b> | 0.87  | 0.39 – 1.94 | 0.731 |
| HER2    | Cohort 1 | 25(13)           | 0.88        | 0.65 – 1.19        | 0.395        | 0.99  | 0.94 – 1.04 | 0.607 |
|         | Cohort 2 | 21(3)            | 0.61        | 0.23 – 1.63        | 0.327        | 0.79  | 0.34 – 1.79 | 0.565 |

NOTE: Breast cancer subtypes were defined based on status of ER, PR and HER2 evaluated with IHC or FISH, respectively.

Abbreviations: TILs, tumor-infiltrating lymphocytes; PaTIL, pathological assessment of TILs on H&E stained tumor sections; HR, hazard ratio; CI, confidence interval; P, p value; TN, triple negative; LUM, luminal subtype; HER2, human epidermal growth factor receptor 2 positive subtype; ER, estrogen receptor; PR, progesterone receptor; IHC, immunohistochemistry; FISH, fluorescent in situ hybridization.

**eTable 9. Correlation between the MeTIL score and other clinical and pathological variables and response to neoadjuvant anthracycline therapy in TOP cohort (logit regression).**

| Characteristic               | OR          | 95% CI             | P            |
|------------------------------|-------------|--------------------|--------------|
| Age ( $\leq 50$ vs $> 50$ )  | 0,34        | 0.03 - 2.84        | 0,329        |
| Tumor size (T1-T2 vs T3-T4)  | 0,88        | 0.03 - 15.3        | 0,932        |
| Nodal status (N0 vs others)  | 0,70        | 0.06 - 83.7        | 0,762        |
| Grade (G1 – G2 vs G3)        | 2,54        | 0.19 - 91.5        | 0,523        |
| HER2 (negative vs positive*) | 12,90       | 0.93 - 382         | 0,083        |
| MeTIL score**                | <b>4,38</b> | <b>1.62 - 21.5</b> | <b>0,020</b> |

NOTE: \*The HER2 status was defined based on FISH (fluorescent in situ hybridization) results.

\*\*The MeTIL score was treated as continuous predictor variable. Abbreviations: OR, odds ratio; CI, confidence interval; P, p value; HER2, human epidermal growth factor receptor 2.

**eTable 10. Correlation between the MeTIL score or gene expression-based immune markers and response to neoadjuvant anthracycline therapy in TOP cohort (logit regression).**

| Characteristic     | OR          | 95% CI             | P            |
|--------------------|-------------|--------------------|--------------|
| <b>MeTIL score</b> | <b>4,38</b> | <b>1.62 – 21.5</b> | <b>0,020</b> |
| STAT1 score        | 7,52        | 1.21 – 115         | 0,067        |
| CD3D               | 3,54        | 1.13 – 18.8        | 0,063        |
| <b>CXCL9</b>       | <b>3,15</b> | <b>1.28 – 13.9</b> | <b>0,046</b> |
| CD247              | 3,83        | 1.11 – 18.3        | 0,051        |

NOTE: All markers were treated as continuous predictor variables. Abbreviations: OR, odds ratio; CI, confidence interval; P, p value.

**eTable 11. Baseline characteristics of patients in different cancer cohorts from TCGA.**

| Cancer type | Characteristic                         | Patients (Events) |
|-------------|----------------------------------------|-------------------|
| BLCA        | years_to_birth                         |                   |
|             | ≤ 67                                   | 191 (64)          |
|             | > 67                                   | 204 (93)          |
|             | neoplasm_diseasestage                  |                   |
|             | S0, SI, SII                            | 136 (31)          |
| BRCA        | SIII, SIV                              | 259 (126)         |
|             | years_to_birth                         |                   |
|             | ≤ 58                                   | 529 (56)          |
|             | > 58                                   | 505 (72)          |
|             | neoplasm_diseasestage                  |                   |
|             | S0, SI, SII                            | 780 (81)          |
|             | SIII, SIV                              | 254 (47)          |
|             | pathology_N_stage                      |                   |
|             | N0                                     | 506 (48)          |
|             | NI, NII, NIII                          | 528 (80)          |
| CESC        | radiations_radiation_regimenindication |                   |
|             | No                                     | 292 (15)          |
|             | Yes                                    | 742 (113)         |
|             | weight_kg_at_diagnosis                 |                   |
|             | ≤ 73.26                                | 183 (45)          |
| COREAD      | > 73.26                                | 121 (24)          |
|             | years_to_birth                         |                   |
|             | ≤ 64                                   | 79 (11)           |
|             | > 64                                   | 104 (28)          |
|             | neoplasm_diseasestage                  |                   |
|             | S0, SI, SII                            | 98 (15)           |
|             | SIII, SIV                              | 85 (24)           |
|             | pathology_T_stage                      |                   |

|      |                                        |                |           |
|------|----------------------------------------|----------------|-----------|
|      | pathology_N_stage                      | T0, T1, TII    | 28 (1)    |
|      |                                        | TIII, TIV      | 155 (38)  |
|      |                                        | N0             | 100 (13)  |
|      |                                        | NI, NII, NIII  | 83 (26)   |
| ESCA | pathology_N_stage                      | N0             | 88 (28)   |
|      |                                        | NI, NII, NIII  | 84 (42)   |
|      | gender                                 | Female         | 24 (6)    |
|      |                                        | Male           | 148 (64)  |
| HNSC | years_to_birth                         | ≤ 61           | 163 (46)  |
|      |                                        | > 61           | 148 (67)  |
|      | radiations_radiation_regimenindication | No             | 15 (3)    |
|      |                                        | Yes            | 296 (110) |
| KIRP | neoplasm_diseasestage                  | S0, SI         | 137 (6)   |
|      |                                        | SII, SIII, SIV | 51 (14)   |
| LGG  | years_to_birth                         | ≤ 43           | 136 (12)  |
|      |                                        | > 43           | 116 (21)  |
|      | tumor_grade                            | G2             | 126 (12)  |
|      |                                        | G3             | 126 (21)  |
| LIHC | pathology_T_stage                      | T0, T1         | 182 (48)  |
|      |                                        | TII, TIII, TIV | 175 (59)  |
|      | ethnicity                              | Caucassian     | 157 (66)  |



|      |                           |                |          |
|------|---------------------------|----------------|----------|
|      |                           | Not-Caucasian  | 200 (41) |
| LUAD | neoplasm_diseasestage     |                |          |
|      |                           | S0, SI         | 151 (34) |
|      |                           | SII, SIII, SIV | 111 (42) |
| LUSC | pathology_T_stage         |                |          |
|      |                           | T0, TI, TII    | 198 (71) |
|      |                           | TIII, TIV      | 46 (22)  |
| OV   | primary_site_of_disease   |                |          |
|      |                           | Ovary          | 103 (49) |
|      |                           | Peritoneum     | 2 (2)    |
| PAAD | years_to_birth            |                |          |
|      |                           | ≤ 64           | 67 (28)  |
|      |                           | > 64           | 76 (41)  |
|      | pathology_T_stage         |                |          |
|      |                           | T0, TI, TII    | 28 (7)   |
|      |                           | TIII, TIV      | 115 (62) |
|      | number_of_lymph_nodes     |                |          |
|      |                           | 0              | 36 (11)  |
|      |                           | 1 or +         | 107 (58) |
|      | completeness_of_resection |                |          |
|      |                           | r0             | 96 (42)  |
|      |                           | r1, r2         | 47 (27)  |
|      | neoplasm_diseasestage     |                |          |
|      |                           | S0, SI         | 19 (4)   |
|      |                           | SII, SIII, SIV | 124 (65) |
|      | gender                    |                |          |
|      |                           | Female         | 65 (35)  |
|      |                           | Male           | 78 (34)  |
| PCPG | gender                    |                |          |
|      |                           | Female         | 101 (2)  |
|      |                           | Male           | 78 (4)   |

|      |                               |        |           |
|------|-------------------------------|--------|-----------|
| PRAD | psa_value                     | ≤ 1.16 | 377 (4)   |
|      |                               | > 1.16 | 38 (3)    |
|      | days_to_psa                   | ≤ 714  | 263 (3)   |
|      |                               | > 714  | 152 (4)   |
| SARC | years_to_birth                | ≤ 61   | 125 (36)  |
|      |                               | > 61   | 124 (47)  |
|      |                               |        |           |
| SKCM | years_to_birth                | ≤ 56   | 175 (85)  |
|      |                               | > 56   | 175 (96)  |
|      | pathology_M_stage             | 0      | 330 (173) |
|      |                               | 1      | 20 (8)    |
|      | days_to_submitted_specimen_dx | ≤ 1308 | 232 (117) |
|      |                               | > 1308 | 118 (64)  |
|      | melanoma_primary_known        | No     | 44 (15)   |
|      |                               | Yes    | 306 (166) |
|      |                               |        |           |
| STAD | years_to_birth                | ≤ 65   | 114 (34)  |
|      |                               | > 65   | 142 (62)  |
|      | pathology_M_stage             | 0      | 240 (87)  |
|      |                               | 1      | 16 (9)    |
|      | number_of_lymph_nodes         | 0      | 65 (15)   |
|      |                               | 1 or + | 191 (81)  |
|      | completeness_of_resection     |        |           |

|      |                                        |               |          |
|------|----------------------------------------|---------------|----------|
|      | pathology_N_stage                      | r0            | 238 (81) |
|      |                                        | r1, r2        | 18 (15)  |
|      |                                        | N0, N1        | 140 (44) |
|      |                                        | N2, N3        | 116 (52) |
| TGCT | ethnicity                              |               |          |
|      |                                        | Caucasian     | 112 (3)  |
|      |                                        | Not-Caucasian | 21 (1)   |
| THCA | neoplasm_diseasestage                  |               |          |
|      |                                        | S0, S1        | 284 (1)  |
|      |                                        | S2, S3, S4    | 216 (13) |
|      | multifocality                          | Multifocal    | 226 (1)  |
|      |                                        | Unifocal      | 274 (13) |
| THYM | gender                                 |               |          |
|      |                                        | Female        | 59 (4)   |
|      |                                        | Male          | 62 (2)   |
|      | years_to_birth                         |               |          |
|      |                                        | ≤ 58          | 57 (1)   |
| UCEC | years_to_birth                         | > 58          | 64 (5)   |
|      |                                        |               |          |
|      | radiations_radiation_regimenindication | ≤ 63          | 262 (28) |
|      |                                        | > 63          | 277 (41) |
|      |                                        | No            | 145 (12) |
|      |                                        | Yes           | 394 (57) |

Abbreviations: BLCA, bladder urothelial carcinoma; BRCA, breast invasive carcinoma; CESC, cervical squamous cell carcinoma and endocervical adenocarcinoma; COREAD, colon and rectum adenocarcinoma; ESCA, esophageal carcinoma; HNSC, head and neck squamous cell carcinoma; KIRP, kidney renal papillary cell carcinoma; LIHC, liver hepatocellular carcinoma; LUAD, lung adenocarcinoma; LUSC, lung squamous cell carcinoma; OV, ovarian serous cystadenocarcinoma; PAAD, pancreatic adenocarcinoma; PCPG, pheochromocytoma and paraganglioma; PRAD, prostate adenocarcinoma; SARC, sarcoma; SKCM, skin cutaneous melanoma; STAD, stomach adenocarcinoma; TGCT, testicular germ cell tumors; THCA, thyroid carcinoma; THYM, thymoma; UCEC, uterine corpus endometrial carcinoma.

**eTable 12. Correlation between MeTIL score or PaTIL and median survival of patients in various cancer cohorts (univariate COX proportional hazards regression).**

| Cancer Type | Patients(Events) | MeTIL score |                    |               | PaTIL |             |       |
|-------------|------------------|-------------|--------------------|---------------|-------|-------------|-------|
|             |                  | HR          | 95% CI             | P             | HR    | 95% CI      | P     |
| BLCA        | 395(157)         | 0.95        | 0.85 - 1.05        | 0.284         | 1     | 0.98 - 1.02 | 0.687 |
| BRCA        | 1034(128)        | 0.93        | 0.84 - 1.03        | 0.171         | 1     | 0.98 - 1.01 | 0.567 |
| CESC        | 304(69)          | 0.93        | 0.81 - 1.08        | 0.359         | 1.01  | 1 - 1.02    | 0.245 |
| COREAD      | 183(39)          | 0.79        | 0.59 - 1.05        | 0.108         | 0.96  | 0.9 - 1.03  | 0.228 |
| ESCA        | 172(70)          | 0.98        | 0.85 - 1.14        | 0.793         | 1.01  | 0.99 - 1.02 | 0.217 |
| <b>HNSC</b> | <b>311(113)</b>  | <b>0.85</b> | <b>0.74 - 0.98</b> | <b>0.025</b>  | 0.99  | 0.97 - 1.01 | 0.248 |
| KIRP        | 188(20)          | 0.89        | 0.64 - 1.24        | 0.486         | 0.95  | 0.79 - 1.13 | 0.536 |
| LGG         | 252(33)          | 1.19        | 0.95 - 1.49        | 0.136         | 0.32  | 0.02 - 6.74 | 0.468 |
| LIHC        | 357(107)         | 0.93        | 0.83 - 1.04        | 0.18          | 1     | 0.96 - 1.04 | 0.9   |
| LUAD        | 262(76)          | 0.91        | 0.78 - 1.08        | 0.279         | 0.99  | 0.97 - 1.01 | 0.374 |
| LUSC        | 244(93)          | 0.86        | 0.74 - 1.01        | 0.0733        | 1.01  | 0.99 - 1.03 | 0.248 |
| OV          | 105(51)          | 1.13        | 0.86 - 1.47        | 0.386         | 1     | 0.99 - 1    | 0.346 |
| PAAD        | 143(69)          | 0.97        | 0.84 - 1.11        | 0.628         | 1     | 0.99 - 1.01 | 0.746 |
| <b>PCPG</b> | <b>179(6)</b>    | <b>0.46</b> | <b>0.24 - 0.88</b> | <b>0.0195</b> | 1.03  | 0.99 - 1.08 | 0.146 |
| PRAD        | 415(7)           | 1.18        | 0.69 - 2.03        | 0.544         | 0.94  | 0.8 - 1.11  | 0.457 |
| SARC        | 249(83)          | 0.94        | 0.84 - 1.06        | 0.335         | 0.86  | 0.69 - 1.07 | 0.181 |
| <b>SKCM</b> | <b>350(181)</b>  | <b>0.91</b> | <b>0.85 - 0.98</b> | <b>0.0103</b> | 0.96  | 0.92 - 1.01 | 0.105 |
| STAD        | 256(96)          | 1.05        | 0.94 - 1.18        | 0.381         | 0.98  | 0.97 - 1    | 0.103 |
| TGCT        | 133(4)           | 1.17        | 0.63 - 2.19        | 0.614         | 1.02  | 0.98 - 1.05 | 0.395 |
| <b>THCA</b> | <b>500(14)</b>   | <b>0.6</b>  | <b>0.36 - 0.98</b> | <b>0.043</b>  | 0.47  | 0.18 - 1.19 | 0.111 |
| <b>THYM</b> | <b>121(6)</b>    | <b>0.66</b> | <b>0.44 - 0.99</b> | <b>0.0425</b> | 0.69  | 0.3 - 1.56  | 0.372 |
| UCEC        | 539(69)          | 0.91        | 0.76 - 1.1         | 0.332         | 1     | 0.99 - 1.02 | 0.778 |

Abbreviations: TILs, tumor-infiltrating lymphocytes; PaTIL, pathological assessment of TILs on H&E stained tumor sections; HR, hazard ratio; CI, confidence interval; P, p value; BLCA, bladder urothelial carcinoma; BRCA, breast invasive carcinoma; CESC, cervical squamous cell carcinoma and endocervical adenocarcinoma; COREAD, colon and rectum adenocarcinoma; ESCA, esophageal carcinoma; HNSC, head and neck squamous cell carcinoma; KIRP, kidney renal papillary cell carcinoma; LIHC, liver hepatocellular carcinoma; LUAD, lung adenocarcinoma; LUSC, lung squamous cell carcinoma; OV, ovarian serous cystadenocarcinoma; PAAD, pancreatic adenocarcinoma; PCPG, pheochromocytoma and paraganglioma; PRAD, prostate adenocarcinoma; SARC, sarcoma; SKCM, skin cutaneous melanoma;

---

STAD, stomach adenocarcinoma; TGCT, testicular germ cell tumors; THCA, thyroid carcinoma; THYM, thymoma; UCEC, uterine corpus endometrial carcinoma

**eTable 13. Correlation between the MeTIL score or PaTIL and median survival of cancer patients in context of other prognostic clinical and pathological variables in various cancer cohorts (multivariate COX proportional hazards regression).**

|             |                   | MeTIL score                            |       |              |          | PaTIL                                  |      |              |          |
|-------------|-------------------|----------------------------------------|-------|--------------|----------|----------------------------------------|------|--------------|----------|
| Cancer Type | Patients (Events) | Variable                               | HR    | 95% CI       | P        | Variable                               | HR   | 95% CI       | P        |
| BLCA        | 395(157)          | MeTIL                                  | 0.92  | 0.83 - 1.02  | 0.13     | PaTIL                                  | 1    | 0.97 - 1.02  | 0.68     |
|             |                   | years_to_birth                         | 1.45  | 1.06 - 2     | 0.0219   | years_to_birth                         | 1.44 | 1.05 - 1.98  | 0.0242   |
|             |                   | neoplasm_diseasestage                  | 2.39  | 1.61 - 3.54  | 1.58e-05 | neoplasm_diseasestage                  | 2.33 | 1.57 - 3.46  | 2.45e-05 |
| BRCA        | 1034(128)         | MeTIL                                  | 0.99  | 0.89 - 1.1   | 0.81     | PaTIL                                  | 1    | 0.99 - 1.01  | 0.914    |
|             |                   | years_to_birth                         | 1.7   | 1.18 - 2.45  | 0.0041   | years_to_birth                         | 1.72 | 1.21 - 2.45  | 0.00253  |
|             |                   | neoplasm_diseasestage                  | 1.65  | 1.05 - 2.57  | 0.0285   | neoplasm_diseasestage                  | 1.64 | 1.05 - 2.56  | 0.0304   |
|             |                   | pathology_N_stage                      | 1.47  | 0.94 - 2.29  | 0.0883   | pathology_N_stage                      | 1.47 | 0.95 - 2.3   | 0.0857   |
|             |                   | radiations_radiation_regimenindication | 3.28  | 1.9 - 5.65   | 2,00E-05 | radiations_radiation_regimenindication | 3.28 | 1.9 - 5.66   | 1.89e-05 |
| CESC        | 304(69)           | MeTIL                                  | 0.93  | 0.8 - 1.07   | 0.322    | PaTIL                                  | 1.01 | 1 - 1.02     | 0.259    |
|             |                   | weight_kg_at_diagnosis                 | 0.74  | 0.45 - 1.21  | 0.23     | weight_kg_at_diagnosis                 | 0.75 | 0.46 - 1.24  | 0.266    |
| COREAD      | 183(39)           | MeTIL                                  | 0.85  | 0.62 - 1.16  | 0.301    | PaTIL                                  | 0.97 | 0.91 - 1.04  | 0.445    |
|             |                   | years_to_birth                         | 2.09  | 1.02 - 4.25  | 0.0427   | years_to_birth                         | 2.1  | 1.03 - 4.28  | 0.0423   |
|             |                   | neoplasm_diseasestage                  | 0.26  | 0.06 - 1.07  | 0.0616   | neoplasm_diseasestage                  | 0.23 | 0.06 - 0.96  | 0.0439   |
|             |                   | pathology_T_stage                      | 4.43  | 0.59 - 33.12 | 0.147    | pathology_T_stage                      | 3.99 | 0.54 - 29.63 | 0.177    |
|             |                   | pathology_N_stage                      | 10.61 | 2.38 - 47.31 | 0.00195  | pathology_N_stage                      | 12   | 2.72 - 52.86 | 0.00102  |

|      |          |                                        |             |                    |               |                                        |      |              |         |
|------|----------|----------------------------------------|-------------|--------------------|---------------|----------------------------------------|------|--------------|---------|
| ESCA | 172(70)  | MeTIL                                  | 1.01        | 0.86 - 1.17        | 0.942         | PaTIL                                  | 1.01 | 0.99 - 1.02  | 0.285   |
|      |          | pathology_N_stage                      | 1.77        | 1.08 - 2.91        | 0.0232        | pathology_N_stage                      | 1.76 | 1.07 - 2.88  | 0.0253  |
|      |          | gender                                 | 1.86        | 0.79 - 4.34        | 0.154         | gender                                 | 1.81 | 0.78 - 4.23  | 0.17    |
| HNSC | 311(113) | <b>MeTIL</b>                           | <b>0.84</b> | <b>0.73 - 0.97</b> | <b>0.0152</b> | PaTIL                                  | 0.99 | 0.97 - 1.01  | 0.228   |
|      |          | years_to_birth                         | 1.54        | 1.05 - 2.25        | 0.0268        | years_to_birth                         | 1.51 | 1.03 - 2.2   | 0.0346  |
|      |          | radiations_radiation_regimenindication | 2.26        | 0.72 - 7.13        | 0.165         | radiations_radiation_regimenindication | 2.14 | 0.68 - 6.77  | 0.194   |
| KIRP | 188(20)  | MeTIL                                  | 0.93        | 0.67 - 1.29        | 0.67          | PaTIL                                  | 0.98 | 0.84 - 1.15  | 0.835   |
|      |          | neoplasm_diseasestage                  | 5.23        | 1.97 - 13.93       | 0.000923      | neoplasm_diseasestage                  | 5.22 | 1.94 - 14.01 | 0.00104 |
| LGG  | 252(33)  | MeTIL                                  | 1.15        | 0.92 - 1.44        | 0.207         | PaTIL                                  | 0.48 | 0.05 - 4.48  | 0.517   |
|      |          | years_to_birth                         | 2.27        | 1.06 - 4.84        | 0.0345        | years_to_birth                         | 2.41 | 1.13 - 5.15  | 0.0228  |
|      |          | tumor_grade                            | 2.3         | 1.08 - 4.91        | 0.0311        | tumor_grade                            | 2.18 | 1.03 - 4.65  | 0.0428  |
| LIHC | 357(107) | MeTIL                                  | 0.93        | 0.84 - 1.04        | 0.231         | PaTIL                                  | 1    | 0.96 - 1.03  | 0.865   |
|      |          | pathology_T_stage                      | 1.47        | 1 - 2.18           | 0.0507        | pathology_T_stage                      | 1.52 | 1.03 - 2.24  | 0.0328  |
|      |          | ethnicity                              | 0.63        | 0.42 - 0.93        | 0.0214        | ethnicity                              | 0.63 | 0.43 - 0.94  | 0.0246  |
| LUAD | 262(76)  | MeTIL                                  | 0.91        | 0.78 - 1.07        | 0.255         | PaTIL                                  | 0.99 | 0.97 - 1.02  | 0.508   |
|      |          | neoplasm_diseasestage                  | 2.12        | 1.34 - 3.34        | 0.00124       | neoplasm_diseasestage                  | 2.08 | 1.32 - 3.28  | 0.00166 |
| LUSC | 244(93)  | <b>MeTIL</b>                           | <b>0.85</b> | <b>0.72 - 0.99</b> | <b>0.0416</b> | PaTIL                                  | 1.01 | 0.99 - 1.03  | 0.262   |
|      |          | pathology_T_stage                      | 1.6         | 0.97 - 2.63        | 0.0647        | pathology_T_stage                      | 1.46 | 0.89 - 2.39  | 0.134   |
| OV   | 105(51)  | MeTIL                                  | 1.12        | 0.85 - 1.46        | 0.418         | PaTIL                                  | 1    | 0.99 - 1.01  | 0.377   |
|      |          | primary_site_of_disease                | 1.46        | 0.35 - 6.17        | 0.605         | primary_site_of_disease                | 1.44 | 0.34 - 6.07  | 0.622   |

|      |          |                               |       |              |          |                               |       |              |          |
|------|----------|-------------------------------|-------|--------------|----------|-------------------------------|-------|--------------|----------|
| PAAD | 143(69)  | MeTIL                         | 0.91  | 0.79 - 1.06  | 0.227    | PaTIL                         | 1     | 0.99 - 1.01  | 0.745    |
|      |          | years_to_birth                | 1.68  | 1.03 - 2.75  | 0.0389   | years_to_birth                | 1.83  | 1.11 - 3.04  | 0.0187   |
|      |          | pathology_T_stage             | 2.53  | 1.1 - 5.79   | 0.0281   | neoplasm_diseasestage         | 3.75  | 1.32 - 10.66 | 0.013    |
|      |          | number_of_lymph_nodes         | 1.95  | 0.99 - 3.84  | 0.0543   | gender                        | 0.64  | 0.39 - 1.05  | 0.0775   |
|      |          | completeness_of_resection     | 1.5   | 0.9 - 2.48   | 0.116    | completeness_of_resection     | 1.73  | 1.05 - 2.86  | 0.0327   |
| PCPG | 179(6)   | MeTIL                         | 0.35  | 0.16 - 0.79  | 0.0108   | PaTIL                         | 1.03  | 0.99 - 1.08  | 0.131    |
|      |          | gender                        | 5.56  | 0.76 - 40.8  | 0.0917   | gender                        | 3.28  | 0.54 - 19.85 | 0.195    |
| PRAD | 415(7)   | MeTIL                         | 1.35  | 0.73 - 2.5   | 0.344    | PaTIL                         | 0.95  | 0.82 - 1.1   | 0.462    |
|      |          | psa_value                     | 15.04 | 2.84 - 79.48 | 0.00142  | psa_value                     | 12.02 | 2.29 - 63.11 | 0.00329  |
|      |          | days_to_psa                   | 0.23  | 0.04 - 1.36  | 0.104    |                               |       |              |          |
| SARC | 249(83)  | MeTIL                         | 0.94  | 0.84 - 1.05  | 0.283    | PaTIL                         | 0.87  | 0.7 - 1.08   | 0.217    |
|      |          | years_to_birth                | 1.47  | 0.95 - 2.28  | 0.0844   | years_to_birth                | 1.42  | 0.92 - 2.2   | 0.117    |
| SKCM | 350(181) | MeTIL                         | 0.85  | 0.78 - 0.91  | 8.71e-06 | PaTIL                         | 0.96  | 0.91 - 1.01  | 0.152    |
|      |          | years_to_birth                | 1.45  | 1.06 - 1.97  | 0.0194   | years_to_birth                | 1.42  | 1.04 - 1.93  | 0.027    |
|      |          | pathology_M_stage             | 1.99  | 0.96 - 4.14  | 0.0662   | days_to_submitted_specimen_dx | 0.25  | 0.17 - 0.35  | 5.12e-14 |
|      |          | days_to_submitted_specimen_dx | 0.2   | 0.14 - 0.3   | 2.22e-16 | melanoma_primary_known        | 1.74  | 1.01 - 3     | 0.0468   |
|      |          | melanoma_primary_known        | 1.51  | 0.87 - 2.62  | 0.141    |                               |       |              |          |
| STAD | 256(96)  | MeTIL                         | 0.99  | 0.89 - 1.11  | 0.93     | PaTIL                         | 0.98  | 0.96 - 1     | 0.0836   |
|      |          | years_to_birth                | 2.04  | 1.29 - 3.22  | 0.00224  | years_to_birth                | 1.89  | 1.19 - 3     | 0.00666  |
|      |          | pathology_M_stage             | 2.26  | 1.07 - 4.78  | 0.0328   | pathology_M_stage             | 2.52  | 1.18 - 5.38  | 0.0167   |



|      |         |                                        |            |                    |               |                                        |       |               |         |
|------|---------|----------------------------------------|------------|--------------------|---------------|----------------------------------------|-------|---------------|---------|
|      |         | number_of_lymph_nodes                  | 2.29       | 1.29 - 4.04        | 0.00451       | number_of_lymph_nodes                  | 1.86  | 0.98 - 3.53   | 0.0576  |
|      |         | completeness_of_resection              | 2.05       | 1.11 - 3.8         | 0.0224        | completeness_of_resection              | 2.06  | 1.13 - 3.76   | 0.0188  |
|      |         |                                        |            |                    |               | pathology_N_stage                      | 1.43  | 0.89 - 2.29   | 0.137   |
| TGCT | 133(4)  | MeTIL                                  | 1.15       | 0.61 - 2.15        | 0.662         | PaTIL                                  | 1.01  | 0.98 - 1.05   | 0.459   |
|      |         | ethnicity                              | 3.49       | 0.31 - 39.04       | 0.31          | ethnicity                              | 3.29  | 0.29 - 36.93  | 0.334   |
| THCA | 500(14) | MeTIL                                  | 0.74       | 0.46 - 1.18        | 0.207         | PaTIL                                  | 0.49  | 0.18 - 1.32   | 0.157   |
|      |         | neoplasm_diseasestage                  | 15.71      | 2.04 - 120.89      | 0.00817       | neoplasm_diseasestage                  | 15.04 | 1.96 - 115.26 | 0.00908 |
|      |         | multifocality                          | 5.07       | 0.65 - 39.69       | 0.122         | multifocality                          | 5.26  | 0.68 - 40.54  | 0.111   |
| THYM | 121(6)  | <b>MeTIL</b>                           | <b>0.6</b> | <b>0.38 - 0.93</b> | <b>0.0242</b> | PaTIL                                  | 0.75  | 0.33 - 1.7    | 0.492   |
|      |         | gender                                 | 0.26       | 0.04 - 1.68        | 0.158         | years_to_birth                         | 5.13  | 0.59 - 44.52  | 0.138   |
| UCEC | 539(69) | MeTIL                                  | 0.89       | 0.74 - 1.07        | 0.216         | PaTIL                                  | 1     | 0.99 - 1.02   | 0.761   |
|      |         | years_to_birth                         | 1.57       | 0.96 - 2.56        | 0.0717        | years_to_birth                         | 1.48  | 0.92 - 2.4    | 0.11    |
|      |         | radiations_radiation_regimenindication | 2.01       | 1.08 - 3.76        | 0.0286        | radiations_radiation_regimenindication | 2.07  | 1.11 - 3.86   | 0.0228  |

NOTE: Optimal multivariate models for each cancer subtype were determined by applying a forward and backward variable selection based on the Akaike's information criterion. Abbreviations: TILs, tumor-infiltrating lymphocytes; PaTIL, pathological assessment of TILs on H&E stained tumor sections; HR, hazard ratio; CI, confidence interval; P, p value; BLCA, bladder urothelial carcinoma; BRCA, breast invasive carcinoma; CESC, cervical squamous cell carcinoma and endocervical adenocarcinoma; COREAD, colon and rectum adenocarcinoma; ESCA, esophageal carcinoma; HNSC, head and neck squamous cell carcinoma; KIRP, kidney renal papillary cell carcinoma; LIHC, liver hepatocellular carcinoma; LUAD, lung adenocarcinoma; LUSC, lung squamous cell carcinoma; OV, ovarian serous cystadenocarcinoma; PAAD, pancreatic adenocarcinoma; PCPG, pheochromocytoma and paraganglioma; PRAD, prostate adenocarcinoma; SARC, sarcoma; SKCM, skin cutaneous melanoma; STAD, stomach adenocarcinoma; TGCT, testicular germ cell tumors; THCA, thyroid carcinoma; THYM, thymoma; UCEC, uterine corpus endometrial carcinoma.

**eTable 14. Primer information for bisulfite pyrosequencing.**

| MeTIL marker | Sense primer                    | Antisense primer                   | Sequencing primer          | Product size |
|--------------|---------------------------------|------------------------------------|----------------------------|--------------|
| RASSF1       | [biot]GTGGTTAAGGTTAGGGATTAGTTGT | AACCATATCCAAAAACCTAAACTCA TTAA     | ATTAAACTACCAAAC TAACAC     | 160 bp       |
| SEMA3B       | [biot]GGGGTAGGGGTTGGGT          | ACATCCCATCTTCTATAAACCCCTTCT TTC    | ACCCTTCCCCTCCCT C          | 85 bp        |
| KLHL6        | GGTGGTAGGAGAATTTTGAAT GTTTATA   | [biot]ACTCTCCTTAATTCTTCAAATA ACCT  | TTGTTAGAGAGTTTTT TATT      | 101 bp       |
| PTPRCAP      | AAGGGTGGTTTAGGT                 | biot]ATCTAATATAAACCAAAATCCTA CAACA | AAGGGTGGTTTAGGT            | 88 bp        |
| INA          | AAGAAGAGGGGATAGGGTTAA           | [biot]AAACAAAACCATCTACATC          | AATTTTAGTAGTTTAG GTATTTTTT | 163 bp       |

NOTE: PyroMark Assay Design 2.0 and PyroMark Q24 software (Qiagen) were used for the design of PCR and sequencing primers. PCR primers for each marker of the MeTIL signature were designed around the target cytosine from the Infinium probe. Thereby, the product size was kept as minimal as possible to anticipate amplification difficulties of fragmented bisulfite-treated FFPE DNA.

**eTable 15. PCA parameters.**

| MeTIL marker | cg20792833 | cg23642747 | cg12069309 | cg20425130 | cg21554552 |
|--------------|------------|------------|------------|------------|------------|
| <b>v1</b>    | -0,5102517 | -0,4350007 | -0,4651394 | -0,4524386 | -0,3596698 |
| <b>s1</b>    | 0,1329287  | 0,1750277  | 0,1220225  | 0,1525058  | 0,2404768  |
| <b>c1</b>    | 0,7135694  | 0,4625343  | 0,4007192  | 0,6471155  | 0,4601555  |

NOTE: Breast cancer subtypes were defined based on status of ER, PR and HER2 evaluated with IHC or FISH, respectively. Optimal multivariate models for each subtype were determined in the discovery cohort (cohort 1 ) by applying a forward and backward variable selection based on the Akaike's information criterion. Abbreviations: TILs, tumor-infiltrating lymphocytes; PaTIL, pathological assessment of TILs on H&E stained tumor sections; HR, hazard ratio; CI, confidence interval; P, p value; TN, triple negative; LUM, luminal subtype; HER2, human epidermal growth factor receptor 2 positive subtype; ER, estrogen receptor; PR, progesterone receptor; IHC, immunohistochemistry; FISH, fluorescent in situ hybridization.

| Section & Topic          | No  | Item                                                                                                                                                   | Reported on page #   |
|--------------------------|-----|--------------------------------------------------------------------------------------------------------------------------------------------------------|----------------------|
| <b>TITLE OR ABSTRACT</b> |     |                                                                                                                                                        |                      |
|                          | 1   | Identification as a study of diagnostic accuracy using at least one measure of accuracy (such as sensitivity, specificity, predictive values, or AUC)  | 1                    |
| <b>ABSTRACT</b>          |     |                                                                                                                                                        |                      |
|                          | 2   | Structured summary of study design, methods, results, and conclusions (for specific guidance, see STARD for Abstracts)                                 | 3                    |
| <b>INTRODUCTION</b>      |     |                                                                                                                                                        |                      |
|                          | 3   | Scientific and clinical background, including the intended use and clinical role of the index test                                                     | 5, 6                 |
|                          | 4   | Study objectives and hypotheses                                                                                                                        | 7                    |
| <b>METHODS</b>           |     |                                                                                                                                                        |                      |
| <i>Study design</i>      | 5   | Whether data collection was planned before the index test and reference standard were performed (prospective study) or after (retrospective study)     | 21                   |
| <i>Participants</i>      | 6   | Eligibility criteria                                                                                                                                   | 21                   |
|                          | 7   | On what basis potentially eligible participants were identified (such as symptoms, results from previous tests, inclusion in registry)                 | 21                   |
|                          | 8   | Where and when potentially eligible participants were identified (setting, location and dates)                                                         | 21                   |
|                          | 9   | Whether participants formed a consecutive, random or convenience series                                                                                | NA                   |
| <i>Test methods</i>      | 10a | Index test, in sufficient detail to allow replication                                                                                                  | 24 & Suppl. methods  |
|                          | 10b | Reference standard, in sufficient detail to allow replication                                                                                          | 21, 22               |
|                          | 11  | Rationale for choosing the reference standard (if alternatives exist)                                                                                  | 5, 16                |
|                          | 12a | Definition of and rationale for test positivity cut-offs or result categories of the index test, distinguishing pre-specified from exploratory         | NA                   |
|                          | 12b | Definition of and rationale for test positivity cut-offs or result categories of the reference standard, distinguishing pre-specified from exploratory | NA                   |
|                          | 13a | Whether clinical information and reference standard results were available to the performers/readers of the index test                                 | 21, 22               |
|                          | 13b | Whether clinical information and index test results were available to the assessors of the reference standard                                          | NA                   |
| <i>Analysis</i>          | 14  | Methods for estimating or comparing measures of diagnostic accuracy                                                                                    | 25                   |
|                          | 15  | How indeterminate index test or reference standard results were handled                                                                                | NA                   |
|                          | 16  | How missing data on the index test and reference standard were handled                                                                                 | Suppl. methods       |
|                          | 17  | Any analyses of variability in diagnostic accuracy, distinguishing pre-specified from exploratory                                                      | NA                   |
|                          | 18  | Intended sample size and how it was determined                                                                                                         | NA                   |
| <b>RESULTS</b>           |     |                                                                                                                                                        |                      |
| <i>Participants</i>      | 19  | Flow of participants, using a diagram                                                                                                                  | NA                   |
|                          | 20  | Baseline demographic and clinical characteristics of participants                                                                                      | eTable7              |
|                          | 21a | Distribution of severity of disease in those with the target condition                                                                                 | NA                   |
|                          | 21b | Distribution of alternative diagnoses in those without the target condition                                                                            | NA                   |
|                          | 22  | Time interval and any clinical interventions between index test and reference standard                                                                 | no                   |
| <i>Test results</i>      | 23  | Cross tabulation of the index test results (or their distribution) by the results of the reference standard                                            | Figure 2 and Table 1 |
|                          | 24  | Estimates of diagnostic accuracy and their precision (such as 95% confidence intervals)                                                                | 12, 13               |
|                          | 25  | Any adverse events from performing the index test or the reference standard                                                                            | no                   |
| <b>DISCUSSION</b>        |     |                                                                                                                                                        |                      |
|                          | 26  | Study limitations, including sources of potential bias, statistical uncertainty, and generalisability                                                  | 17                   |
|                          | 27  | Implications for practice, including the intended use and clinical role of the index test                                                              | 18, 20               |
| <b>OTHER INFORMATION</b> |     |                                                                                                                                                        |                      |
|                          | 28  | Registration number and name of registry                                                                                                               | NA                   |
|                          | 29  | Where the full study protocol can be accessed                                                                                                          | NA                   |
|                          | 30  | Sources of funding and other support; role of funders                                                                                                  | 4                    |

# STARD 2015

---

## AIM

STARD stands for “Standards for Reporting Diagnostic accuracy studies”. This list of items was developed to contribute to the completeness and transparency of reporting of diagnostic accuracy studies. Authors can use the list to write informative study reports. Editors and peer-reviewers can use it to evaluate whether the information has been included in manuscripts submitted for publication.

---

## EXPLANATION

A **diagnostic accuracy study** evaluates the ability of one or more medical tests to correctly classify study participants as having a **target condition**. This can be a disease, a disease stage, response or benefit from therapy, or an event or condition in the future. A medical test can be an imaging procedure, a laboratory test, elements from history and physical examination, a combination of these, or any other method for collecting information about the current health status of a patient.

The test whose accuracy is evaluated is called **index test**. A study can evaluate the accuracy of one or more index tests. Evaluating the ability of a medical test to correctly classify patients is typically done by comparing the distribution of the index test results with those of the **reference standard**. The reference standard is the best available method for establishing the presence or absence of the target condition. An accuracy study can rely on one or more reference standards.

If test results are categorized as either positive or negative, the cross tabulation of the index test results against those of the reference standard can be used to estimate the **sensitivity** of the index test (the proportion of participants *with* the target condition who have a positive index test), and its **specificity** (the proportion *without* the target condition who have a negative index test). From this cross tabulation (sometimes referred to as the contingency or “2x2” table), several other accuracy statistics can be estimated, such as the positive and negative **predictive values** of the test. Confidence intervals around estimates of accuracy can then be calculated to quantify the statistical **precision** of the measurements.

If the index test results can take more than two values, categorization of test results as positive or negative requires a **test positivity cut-off**. When multiple such cut-offs can be defined, authors can report a receiver operating characteristic (ROC) curve which graphically represents the combination of sensitivity and specificity for each possible test positivity cut-off. The **area under the ROC curve** informs in a single numerical value about the overall diagnostic accuracy of the index test.

The **intended use** of a medical test can be diagnosis, screening, staging, monitoring, surveillance, prediction or prognosis. The **clinical role** of a test explains its position relative to existing tests in the clinical pathway. A replacement test, for example, replaces an existing test. A triage test is used before an existing test; an add-on test is used after an existing test.

Besides diagnostic accuracy, several other outcomes and statistics may be relevant in the evaluation of medical tests. Medical tests can also be used to classify patients for purposes other than diagnosis, such as staging or prognosis. The STARD list was not explicitly developed for these other outcomes, statistics, and study types, although most STARD items would still apply.

---

## DEVELOPMENT

This STARD list was released in 2015. The 30 items were identified by an international expert group of methodologists, researchers, and editors. The guiding principle in the development of STARD was to select items that, when reported, would help readers to judge the potential for bias in the study, to appraise the applicability of the study findings and the validity of conclusions and recommendations. The list represents an update of the first version, which was published in 2003.

More information can be found on <http://www.equator-network.org/reporting-guidelines/stard>.

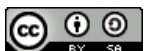

Supplement: sd1 [file 1]
